1 **The genetics of male pheromone preference difference between**

2 ***Drosophila melanogaster* and *D. simulans***

3 **Michael P. Shahandeh<sup>\*,1</sup>, Alison Pischedda<sup>2</sup>, Jason M. Rodriguez<sup>1</sup>, and Thomas L.**  
4 **Turner<sup>1</sup>**

5

6 \*Corresponding author: mshahandeh@ucsb.edu

7 <sup>1</sup>Dept. of Ecology, Evolution, and Marine Biology, University of California Santa Barbara

8 <sup>2</sup>Department of Biology, Barnard College, Columbia University, New York NY 10027

9

10 **Key words**

11 male mate choice, pheromones, courtship behavior, reproductive isolation, behavioral genetics

12

13 **Author contributions**

14 MPS and TLT conceived of the study and interpreted the data. MPS, AP, and JMR, designed the

15 assays and collected the data. MPS analyzed the data. All authors wrote the manuscript.

16 **Acknowledgements**

17 We are grateful to Veronica Cochrane, Cameryn Brock, Susanne Tilk, Wesley Cochrane, Maddie

18 Evancie, Devon Cooper, and Eamon Winden for their hours spent observing *Drosophila*

19 courtship. We also thank the undergraduate students of the MCDB161L M'13 course at UCSB.

20 This program was supported in part by a grant to the University of California, Santa Barbara

21 from the Howard Hughes Medical Institute through the Science Education Program. This work

22 would not have been possible without the community-supported resources available at the

23 Cornell *Drosophila* Stock Center (CSBR 1820594), the Bloomington *Drosophila* stock center (NIH

24 P400D018537), or FlyBase (flybase.org; Gramates et al., 2017). This work was funded by the

25 National Institutes of Health (R01 GM098614).

26 **Abstract**

27 Species of flies in the genus *Drosophila* differ dramatically in their preferences for mates, but  
28 little is known about the genetic or neurological underpinnings of this evolution. Recent  
29 advances have been made to our understanding of one case: pheromone preference evolution  
30 between the species *D. melanogaster* and *D. simulans*. Males of both species are very sensitive  
31 to the pheromone 7,11-HD that is present only on the cuticle of female *D. melanogaster*. In one  
32 species this cue activates courtship, and in the other it represses it. This change in valence was  
33 recently shown to result from the modification of central processing neurons, rather than  
34 changes in peripherally expressed receptors, but nothing is known about the genetic changes  
35 that are responsible. In the current study, we show that a 1.35 Mb locus on the X chromosome  
36 has a major effect on male 7,11-HD preference. Unfortunately, when this locus is divided, the  
37 effect is largely lost. We instead attempt to filter the 159 genes within this region using our  
38 newfound understanding of the neuronal underpinnings of this phenotype to identify and test  
39 candidate genes. We present the results of these tests, and discuss the difficulty of identifying  
40 the genetic architecture of behavioral traits and the potential of connecting these genetic  
41 changes to the neuronal modifications that elicit different behaviors.

## 42 **Introduction**

43 Understanding the proximate mechanisms of phenotypic divergence has long been a goal of  
44 evolutionary biologists (Stern et al., 2009; Stern & Orgogozo, 2008). Advances in genome  
45 sequencing have led to a recent boom in genotype-phenotype association studies, the large  
46 majority being for morphological traits (Orgogozo & Martin, 2013). These findings have resulted  
47 in a better understanding of the molecular underpinnings of morphological evolution, allowing  
48 us to observe general patterns about the types of genetic changes commonly associated with  
49 phenotypic change, the number of loci involved, and the general size of their effects  
50 (Kittelmann et al., 2017; Martin & Orgogozo, 2013; Rebeiz & Williams, 2017). Comparatively,  
51 we have fewer studies of the proximate mechanisms underlying behavioral divergence with  
52 which to draw broad conclusions. This is unfortunate, because behaviors are important  
53 phenotypes, particularly with respect to speciation and biodiversity. For example, differences in  
54 host, habitat, and mating behaviors can form strong reproductive barriers between species  
55 (Coyne & Orr, 1997, 2004).

56 Behaviors holistically involve the detection of stimuli via the peripheral nervous system,  
57 sensory integration via central nervous system processing, and the coordinated production of a  
58 behavioral output. It is therefore surprising that a large proportion of genes known to cause  
59 behavioral divergence between species affect sensory perception at the periphery, rather than  
60 the other molecular determinants of behavior (Auer et al., 2019; Cande et al., 2013; Leary et al.,  
61 2012; McBride et al., 2014). This could indicate that changes at the periphery, mainly in  
62 membrane-bound stimulus-detecting receptors, are favored targets of selection because they  
63 can have drastic effects on specific phenotypes while minimizing pleiotropic effects (McBride,  
64 2007). It is, however, difficult to generalize from so few examples. Moreover, it is quite possible  
65 that this pattern is due mainly to ascertainment bias (Rockman, 2012). Indeed, many case  
66 studies that have successfully mapped causal genes explaining behavioral divergence have used  
67 a candidate-gene approach targeting sensory receptors, so it is plausible that other types of  
68 changes are more common but have been overlooked. For example, recent studies that take  
69 whole-genome approaches have identified important variants in genes affecting behavior that  
70 act at the synapse (Kocher et al., 2018), or as hormonal neuromodulators (Bendesky et al.,

71 2017). To make generalized predictions about the types of changes underlying behavioral  
72 divergence, we need more studies of the genetic basis of behavior that take unbiased  
73 approaches, preferably in systems with multiple comparable cases of evolution in similar  
74 behaviors (i.e. "metamodel systems" sensu Kopp, 2009). With an active research community,  
75 many genetic tools, and an easily manipulated life-history, the *Drosophila* species group  
76 provides an excellent opportunity to make further progress, particularly because closely related  
77 species differ dramatically in many behaviors.

78 Courtship preference is one behavior that varies dramatically among *Drosophila* species.  
79 In *Drosophila*, males and females express a blend of cuticular hydrocarbons (CHCs), many of  
80 which act as gustatory pheromones (Pardy et al., 2018). These CHCs are variable between  
81 species (Jallon & David, 1987), and can act as sex pheromones (Ferveur & Sureau, 1996) and  
82 species identification signals (Billeter et al., 2009). For example, *D. melanogaster* females  
83 predominantly express 7,11-heptacosadiene (7,11-HD), while females in the closely-related  
84 species, *D. simulans*, primarily express 7-tricosene (7T). The male responses to these  
85 pheromones differ dramatically between species: *D. melanogaster* males willingly court  
86 conspecific females, but the presence of 7,11-HD on the *D. melanogaster* female cuticle  
87 suppresses courtship by *D. simulans* males (Billeter et al., 2009; Clowney et al., 2015; Seeholzer  
88 et al., 2018). Male pheromone preference, therefore, constitutes an early barrier to  
89 interspecific mating (Shahandeh et al., 2018).

90 Both *D. melanogaster* and *D. simulans* males detect 7,11-HD via gustatory receptor  
91 neurons in the forelegs that express the ion channel *ppk23* (Lu et al., 2012, 2014; Thistle et al.,  
92 2012; Toda et al., 2012). From there, the signal is propagated through two clusters of neurons  
93 (*vAB3* and *maL* neurons) that simultaneously excite and inhibit the P1 central courtship neurons  
94 (Clowney et al., 2015). These P1 central courtship neurons act as command neurons, essentially  
95 like an on/off switch for male courtship (Auer & Benton, 2016). A recent study found that the  
96 evolution of the interactions among these neurons in the central nervous system causes the  
97 difference in 7,11-HD preference, rather than the evolution of the peripheral nervous system.  
98 (Seeholzer et al., 2018). In *D. melanogaster*, 7,11-HD promotes courtship because the excitation  
99 of P1 neurons is greater than the inhibition; in *D. simulans*, the opposite seems to be the case

100 (Seeholzer et al., 2018). However, the molecular changes underlying these differences in  
101 neuronal interactions remain unknown. This detailed, if still incomplete, understanding of the  
102 cellular basis of behavioral evolution presents an excellent opportunity to map the causal genes  
103 and link evolution in behavior at the genetic, cellular, and organismal levels.

104 Here we present the results of a genotype-phenotype association study where we make  
105 considerable progress toward identifying the loci underlying shifts in 7,11-HD preference  
106 behavior between *D. simulans* and *D. melanogaster*. First, we confirm a previous result  
107 demonstrating that a portion of the male preference phenotype maps to the X chromosome  
108 (Kawanishi & Watanabe, 1981). We then show that the preference for 7,11-HD can be  
109 recovered in hybrids with a single 1.35 Mb region of the *D. melanogaster* X chromosome. We  
110 additionally present the results of two attempts to map this region to a causal gene; both a  
111 fine-mapping and candidate gene approach were unsuccessful. Nonetheless, our findings have  
112 identified a fraction of the *D. melanogaster* genome containing loci for further functional  
113 investigation.

114

## 115 **Methods**

### 116 ***Fly stocks and maintenance***

117 We maintained all fly strains in 25 mm diameter vials on standard cornmeal/molasses/yeast  
118 medium at 25°C under a 12 h:12 h light/dark cycle. Under these conditions, we established non-  
119 overlapping two-week lifecycles. Every 14 days, we transferred all of the emerged male and  
120 female adult flies into vials containing fresh food, where they were allowed to oviposit for 1–3  
121 days before being discarded. To test for species differences in male preference, we used two *D.*  
122 *simulans* strains: simC167.4 (obtained from the UC San Diego *Drosophila* Stock Center; Stock #:  
123 14021-0251.99) and *Lhr* (Brideau et al., 2006; Watanabe, 1979). We used four *D. melanogaster*  
124 strains: Canton-S, DGRP-380 (MacKay et al., 2012), C(1)DX-LH<sub>M</sub> and LH<sub>M</sub> (Rice et al., 2005). To  
125 screen portions of the X chromosome, we created duplication hybrids (see below) using a total  
126 of 22 Dp(1;Y) strains listed in Table 1 (Cook et al., 2010).

127

### 128 ***Hybrid crosses***

129 To confirm the role of the X chromosome in male mate discrimination, we needed to make F1  
130 hybrid males by crossing *D. melanogaster* females to *D. simulans* males (hybrid offspring would  
131 then have a *D. melanogaster* X) and by the reciprocal cross (hybrids would have the same  
132 autosomal genotype, but the *D. simulans* X). *D. melanogaster/D. simulans* hybrid males  
133 normally die during development, while hybrid females are infertile (Watanabe, 1979). The *Lhr*  
134 strain of *D. simulans* rescues male viability, allowing us to collect living male and female hybrid  
135 offspring (Figure 1A). However, crossing females from this *D. simulans* hybrid male rescue strain  
136 to *D. melanogaster* males never yielded offspring, probably because of very strong pre-mating  
137 isolation. Instead, we used genetic tools (see below) to make these same genotypes while only  
138 crossing *D. melanogaster* females to *D. simulans* males. In this crossing direction, we found  
139 hybrids could be made using the following steps. First, we collected 20 *D. simulans* males as  
140 virgins and aged them for 7-12 days. We collected 10 *D. melanogaster* females as very young  
141 virgins, just 2-4 hours after eclosion. We immediately combined 10 very young *D. melanogaster*  
142 virgins with 20 aged *D. simulans* males in a vial with food media. We pushed a foam plug into  
143 the vial, leaving only 1-2 cm of space above the food surface. We held these hybrid cross vials in  
144 this manner for 2-3 days before transferring the flies to a new vial with fresh food to oviposit.

145 To create male hybrids with the *D. melanogaster* X chromosome (melX), we set up the  
146 above crosses using the LH<sub>M</sub> strain of *D. melanogaster* and the *Lhr* strain of *D. simulans*. To  
147 create male hybrids with the X chromosome of *D. simulans* (simX), we set up the same cross  
148 using the C(1)DX-LH<sub>M</sub> strain of *D. melanogaster* and the *Lhr* strain of *D. simulans*. Females of the  
149 C(1)DX-LH<sub>M</sub> strain have a compound X chromosome and a Y chromosome in an LH<sub>M</sub> autosomal  
150 background. The male offspring of this cross inherit their X chromosome from the father, while  
151 their Y chromosome and cytoplasm are inherited from the mother (Figure 1B). Thus, simX and  
152 melX hybrids only differ in their sex chromosomes. By directly comparing them we can isolate  
153 the effect of the sex chromosomes (primarily the X chromosome) on male courtship preference  
154 behavior.

155

### 156 **Male courtship assays**

157 For all courtship assays, we aged virgin males and females in single-sex vials for 4 days at 25°C

158 in densities of 10 and 20, respectively. We gently aspirated a single experimental male into a 25  
159 mm diameter vial with standard cornmeal/molasses/yeast medium 24 hours before  
160 observation. On the morning of observation, we aspirated a single female into the vial and  
161 pushed a foam plug down into the vial, leaving a space of 1-3 cm above the food surface. This  
162 limited space ensures that flies interact within the observation time period. We observed flies  
163 for 30 minutes, collecting minute-by-minute courtship data by manually scoring each pair for  
164 three easily observed stages of courtship: singing (single wing extensions and vibration),  
165 attempted copulation, and successful copulation. We scored pairs that exhibited multiple  
166 stages within a single minute once within that minute. We conducted 2 observations per day at  
167 room temperature between the hours of 9 and 11 AM (0-2 hours after fly incubator lights turn  
168 on). All observers were blind to both male and female genotype (see below).

169 We tested the male courtship behavior of the following strains: *D. melanogaster* (LH<sub>M</sub>,  
170 Canton-S, RNAi strains), *D. simulans* (*Lhr* and simC167.4), and various melX and simX F1 hybrids.  
171 We measured male courtship towards three types of females, *D. melanogaster*, *D. simulans*,  
172 and F1 hybrid females, using no-choice (single female) assays. All *D. simulans* female courtship  
173 objects were of the simC167.4 strain. Female courtship objects for *D. melanogaster* were of the  
174 DGRP-380 strain when testing males of the LH<sub>M</sub>, *Lhr*, melX, simX, and duplication hybrid  
175 genotypes (i.e. when testing for an effect of the X chromosome), but we used females from the  
176 Canton-S strain with Canton-S males, RNAi males and controls, and gene aberration melX  
177 hybrids (see below), because these additional data were collected during a separate follow-up  
178 experiment. We made F1 hybrid females using the methods described above (i.e. from a cross  
179 between LH<sub>M</sub> and *Lhr*; Figure 1A).

180

### 181 **Duplication hybrid crosses**

182 Mapping the genes responsible for this evolved behavior is very challenging for several reasons.  
183 QTL analysis is not possible using these species, as hybrid males are inviable and hybrid females  
184 are infertile. One way around this problem is to use large engineered deletions to make loci  
185 hemizygous rather than heterozygous in F1 hybrids, exposing recessive or additive alleles from  
186 the *D. simulans* parent (Laturney & Moehring, 2012; Moehring & Mackay, 2004; Pardy et al.,

187 2018; Ryder et al., 2004). However, a deletion screen is not possible for an X-linked behavior  
188 present only in males because the X is already hemizygous, so large deletions are lethal.  
189 Instead, we used a set of transgenic strains (Cook et al., 2010) to create duplication hybrid  
190 males – hybrids with a complete *D. simulans* X chromosome and an additional segment of the  
191 *D. melanogaster* X chromosome translocated to *D. melanogaster* Y chromosome. (Figure 1C,  
192 Table 1A). This method has been used to map hybrid incompatibility loci (Cattani & Presgraves,  
193 2012), but to our knowledge has not been used to map differences in morphology or behavior.  
194 The primary caveat to this method is the inability to detect *D. melanogaster* loci that are  
195 recessive to their *D. simulans* counterparts. Because F1 hybrid males are hemizygous, it is  
196 impossible to assess dominance a priori. Despite this limitation, the primary advantage to this  
197 method is our ability to assay a large portion of the X chromosome (80%) using just 16 DP(1;Y)  
198 hybrid strains. To create these hybrids, we crossed *D. melanogaster* males from a DP(1;Y) strain  
199 to *D. melanogaster* females from the C(1)DX-LH<sub>M</sub> strain (Figure 1C). We then took the resulting  
200 female offspring, which carry a *D. melanogaster* compound X chromosome and a *D.*  
201 *melanogaster* Y chromosome that has a translocated segment of the X chromosome, and  
202 crossed them to *D. simulans* *Lhr* males using the hybrid cross methods described above. The  
203 DP(1;Y) Y chromosome is marked with the dominant visible *Bar* mutation, so inheritance of this  
204 chromosome is easy to track. After assaying our original 16 duplication hybrid strains, we tested  
205 additional strains with duplications that partially overlap a region we identified in the initial  
206 screen in an attempt to fine-map loci within DP(1;Y) segments of interest (Table 1B).

207

### 208 ***Perfuming D. simulans* females with 7,11-HD**

209 Adapting the methods of Thistle et al. (2012), we perfumed *D. simulans* females with synthetic  
210 7,11-HD to test for a role in courtship behavior for a duplication of interest (BSC100). To  
211 perfume females, we placed 20 simC167.4 females into an empty 25 mm diameter vial. We had  
212 previously added either 40  $\mu$ L of ethanol (sham treatment), or 200 or 400  $\mu$ g of 7,11-HD  
213 dissolved in 40  $\mu$ L ethanol (perfume treatment) to the vial, and allowed the liquid to evaporate.  
214 We then vortexed the vials on the highest setting for three 20-second intervals separated by 20  
215 seconds of recovery. We allowed females to recover from vortex mixing for 30 minutes before



216 loading them into courtship vials. We conducted courtship assays as described above. We  
217 detected no difference in courtship between our 200 and 400  $\mu$ g perfuming treatments ( $\chi^2 =$   
218 0.083, df = 1, p = 0.773), so we combined them into a single perfume treatment in our final  
219 analysis.

220

### 221 **Selecting and testing candidate genes for validation**

222 The BSC100 duplication region that has a significant effect on male courtship behavior in a  
223 hybrid background (see results) contains 159 genes (Table S1). In order to select appropriate  
224 candidate genes to test for a role in divergent male courtship behaviors, we used modENCODE  
225 expression data (Graveley et al., 2011) to identify genes expressed in the *D. melanogaster*  
226 central nervous system, a justification set by the findings of Seehozer et al. (2018). We further  
227 filtered this list of genes, obtained from FlyBase (Dos Santos et al., 2015), for biological function  
228 in nervous system development/function, or transcription factor activity to exclude any genes  
229 not specific to the nervous system (i.e. cell maintenance loci). Finally, we selected any of the 25  
230 remaining genes that have known *Fruitless* binding sites or interactions, as *Fruitless* is  
231 responsible for the male specific wiring of the central nervous system (Goto et al., 2011; Manoli  
232 et al., 2005; Vernes, 2014). This left us with a list of 6 candidate genes. For 4 of the 6 genes, we  
233 were able to procure a non-lethal aberration (Table 2A). We crossed females of these strains to  
234 *D. simulans Lhr* males to create melX hybrids with individual gene knockouts. Two of these  
235 knockouts (*Smr* and *pot*) are held over a balancer chromosome in females, and thus produce  
236 two types of melX hybrid males: those carrying a balancer (intact) X chromosome, and those  
237 carrying a defective X-linked allele. Unfortunately, *pot* defective hybrid males were not viable,  
238 and thus could not be observed (Table S3). For *Smr*, we compared both balancer hybrids and  
239 *Smr<sup>-</sup>* hybrids paired with *D. melanogaster* and *D. simulans* females in the courtship assays  
240 described above. For the remaining, unbalanced strains (*Ten-a* and *Pde9*), we compared  
241 courtship of knockout hybrid males toward *D. simulans* and *D. melanogaster* females. *Smr* and  
242 *Pde9* hybrids presented an extra challenge, as males have white eyes (Table 2A), and thus,  
243 difficulty tracking a female courtship target. To remedy this challenge, we observed these males  
244 as above, but in a smaller reduced arena to increase interaction between visually impaired

245 males and females. To modify the courtship arena for these males, we inserted a single piece of  
246 plastic vertically into the media, dividing the vial in half, before pushing a foam plug down into  
247 the vial, resting 1-2 cm from the food surface.

248 Because the two remaining genes were either lethal in males (*cacophony*), or had no  
249 aberration available at all (*Ir11a*), we knocked down expression in *D. melanogaster* flies using  
250 RNAi under the control of the Gal4/UAS system (Perkins et al., 2015). For RNAi knock-down  
251 strains, we compared progeny of RNAi lines crossed with the pan-neuronal elav-Gal4 stock  
252 (Table 2B). The elav-Gal4 insertion is maintained in heterozygotes over a balancer  
253 chromosome. Thus, this cross yields RNAi males, which express hairpin RNAi for the target gene  
254 in all of their neurons, and control males, which encode for, but do not express the hairpin RNAi  
255 because they lack Gal4 expression in neurons. Control males express a dominant visible marker  
256 contained on the balancer chromosome they inherit instead of the Gal4 insertion. In this way,  
257 for males paired with both *D. melanogaster* and *D. simulans* females, we compare the courtship  
258 of males where expression of the gene of interest is reduced in neurons, to males of the same  
259 background without reduced expression in the nervous system. While knocking out (or down)  
260 expression of these 6 candidate genes allows us to compare the specific effects of loss of  
261 function of *D. melanogaster* alleles to functioning alleles in their respective backgrounds  
262 (hybrid for knock-outs, *D. melanogaster* for RNAi knockdown), it is not immediately clear what  
263 phenotype to expect during these tests. This presents another challenge in interpreting these  
264 results (see Discussion).

265

### 266 **Data analysis**

267 From the minute-by-minute courtship data, for each male-female combination (see below), we  
268 collected binomial data (court/did not court) to determine the courtship frequency (CF) of male  
269 genotypes. We only considered males that spent 10% or more of the total assay time (i.e., >3  
270 min) in one of the three courtship stages as successfully displaying courtship. For male  
271 genotypes, unless otherwise stated, we used Fisher's exact test to compare the proportion of  
272 males that courted a given female type followed by posthoc analysis with sequential Bonferroni  
273 tests (Holm, 1979).

274 For each male that displayed courtship towards a female target, we also calculated the  
275 total percent of assay time (30 minutes) that a male spent courting as a proxy for male  
276 courtship effort (CE). For males that mated with females, we calculated CE as the percent of  
277 time a male spent courting from the start of the assay until the time of copulation. Unlike with  
278 CF, we used no minimum threshold for CE. CE is representative of male investment in any given  
279 female, another indication of male choice (Edward & Chapman, 2011). Because the courtship  
280 effort distributions are highly skewed, we report the median values for comparison across  
281 strains. For each male genotype, we compared courtship effort between female genotypes  
282 using the Mann-Whitney U test followed by posthoc analysis with sequential Bonferroni tests  
283 (Holm, 1979).

284

## 285 **Results**

### 286 ***A significant conspecific courtship preference between *D. melanogaster* and *D. simulans****

287 For both *D. melanogaster* strains that we assayed, we detected significantly higher courtship  
288 frequencies when males were paired with females of their own species (Figure 2A, Table S2).  
289 Both LH<sub>M</sub> and Canton-S courted *D. melanogaster* females significantly more frequently than *D.*  
290 *simulans* females (LH<sub>M</sub>:  $p = 0.0003$ ; Canton-S:  $p = 0.0032$ ). Likewise, both *D. simulans* strains  
291 displayed higher courtship frequencies with *D. simulans* females than *D. melanogaster* females  
292 (*Lhr*:  $p = 5.34E-09$ ; simC167.4:  $p = 5.47E-12$ ). There were no differences in the courtship  
293 frequencies among strains of the same species ( $p = 1$  for both *D. melanogaster* and *D.*  
294 *simulans*). Unsurprisingly, when we calculated a consensus p-value (Rice, 1990), which tests the  
295 combined effect of independent tests of the same hypothesis, for the two *D. melanogaster*  
296 strains and the two *D. simulans* strains, conspecific courtship preferences remained highly  
297 significant ( $p = 1.61E-5$  and  $p < 1.00E-25$ , respectively), suggesting this is indeed a species-level,  
298 rather than strain-specific difference.

299 We also observed each *D. melanogaster* and *D. simulans* strain with F1 hybrid females  
300 (Figure 2A, Table S2). These females still produce 7,11-HD, due to a single functioning copy of  
301 *desatF* (Shirangi et al., 2009), and concordantly, *D. melanogaster* and *D. simulans* males court  
302 them similarly to *D. melanogaster* females. We found that our *D. melanogaster* strains were

303 just as likely to court F1 hybrid females as they were to court *D. melanogaster* ( $p = 0.6486$  for  
304  $LH_M$ , and  $p = 6724$  for Canton-S), and these comparisons remained non-significant when we  
305 calculated a consensus p-value ( $p = 0.7980$ ). Conversely, for one of our *D. simulans* strains,  
306 simC167.4, we found that males court F1 hybrid females significantly less often than *D.*  
307 *simulans* females ( $p = 5.59E-07$ ). *Lhr* males had a much lower courtship frequency with F1  
308 hybrid females compared to *D. simulans* females (20% vs. 65%, respectively), but this difference  
309 was not significant, likely due to small sample size ( $p = 0.1003$  and  $N = 10$ ). Supporting this, a  
310 consensus p-value for both *D. simulans* strains found that *D. simulans* overall had a significantly  
311 higher courtship frequency with *D. simulans* females than with F1 females ( $p = 9.93E-07$ ). For  
312 both *D. simulans* strains, we detected no difference in courtship frequency toward F1 and *D.*  
313 *melanogaster* females, as all had relatively low courtship frequencies (for *Lhr*  $p = 0.1230$ , and  
314 for simC167.4  $p = 0.2089$ ; and consensus  $p = 0.1197$ ).

315 We find less striking differences when we calculate the courtship effort of those males  
316 that did court (Figure 2B, Table S2). For example, once they began courting, Canton-S males  
317 courted all three female types with equal vigor ( $p = 1$  for all comparisons).  $LH_M$  males, however,  
318 courted *D. melanogaster* with much higher vigor than *D. simulans* females ( $p = 0.0011$ ). Thus,  
319 unlike courtship frequency, courtship effort appears to have strain-specific effects within the *D.*  
320 *melanogaster* strains we surveyed. For *D. simulans*, we detected a nearly significant increase in  
321 courtship effort for simC167.4 males that courted *D. simulans* females compared to males that  
322 courted F1 females ( $p = 0.0506$ ). We are unable to detect significant differences in courtship  
323 effort for *Lhr* males among any comparisons, or for simC4 male comparisons involving *D.*  
324 *melanogaster* females, because so few males courted *D. melanogaster* females (and F1 females  
325 for *Lhr*).

326

### 327 ***The X-chromosome partially explains differences in courtship behavior***

328 Qualitatively, the behavior of hybrid males largely replicates the behavior of the X chromosome  
329 donating parent (Figure 2, Table S2). Like males of the *D. melanogaster* parent strain ( $LH_M$ ),  
330 melX hybrid males court both *D. melanogaster* and F1 hybrid females significantly more often  
331 than *D. simulans* females (*D. melanogaster*:  $p = 0.0052$ , F1:  $p = 0.0005$  Figure 2A). Also like the

332 LH<sub>M</sub> parent strain, melX males court F1 hybrid females and *D. melanogaster* females at similar  
333 frequencies ( $p = 0.6724$ ). Quantitatively, however, the behavior of melX males does not entirely  
334 replicate that of the *D. melanogaster* parent strain. For instance, although still significantly  
335 higher than when paired with *D. simulans* females, melX males court both *D. melanogaster*  
336 females and F1 females at significantly lower frequencies than LH<sub>M</sub> ( $p = 9.92E-07$  and  $p =$   
337  $0.0022$ , respectively). With respect to courtship effort, melX males court each female  
338 indistinguishably (all  $p > 0.8541$ , Figure 2B).

339 The behavior of simX males more closely reproduces that of the *D. simulans* parent  
340 strain (*Lhr*). Like *Lhr*, simX males court *D. simulans* females at much higher frequencies than *D.*  
341 *melanogaster* females ( $p = 1.32E-15$ , Figure 2A) and F1 females ( $p = 4.03E-14$ ). Unlike the *Lhr*  
342 parent strain, simX males court F1 females significantly more frequently than *D. melanogaster*  
343 females ( $p = 1.57E-05$ ). Courtship towards *D. melanogaster* was still too rare to detect  
344 differences in courtship effort compared to *D. simulans* or F1 females (both  $p = 1$ , Figure 2B),  
345 but simX males courted *D. simulans* with significantly higher effort than F1 females ( $p = 0.0005$ ,  
346 Figure 2B). Quantitatively, simX males behave very similarly to their *D. simulans* parents. simX  
347 males court *D. melanogaster* and F1 females with frequencies equivalent to that of *Lhr* males ( $p$   
348  $= 0.5876$  and  $p = 0.7190$ , respectively), but they court *D. simulans* females at a higher frequency  
349 ( $p = 0.0373$ ). We suspect this latter result is a byproduct of increased heterozygosity relative to  
350 the inbred *Lhr* parent strain.

351

### 352 ***A single region of the D. melanogaster X chromosome changes simX hybrid courtship*** 353 ***behavior***

354 To test specific regions of the X chromosome for their role in courtship preference differences,  
355 we measured the courtship behavior of 16 duplication hybrids (Table 1A, Figure 1C). These  
356 duplication hybrids are simX hybrids made heterozygous for one stretch of the *D. melanogaster*  
357 X chromosome. We observed 15 of these strains with *D. melanogaster* females, and  
358 interestingly, none displayed courtship ( $N = 6-20$  for each,  $N = 179$  total, Table S2). All 16 of the  
359 duplication hybrid strains did court both *D. simulans* and F1 females, however. We detected  
360 significant variation in the amount of courtship these lines displayed to both female courtship

361 targets ( $\chi^2 = 55.36$ ,  $df = 15$ ,  $p\text{-value} = 1.55\text{e-}06$  for *D. simulans* females,  $N = 709$  total; and  $\chi^2 =$   
362  $66.58$ ,  $df = 15$ ,  $p\text{-value} = 1.80\text{e-}08$  for F1 females,  $N = 759$  total).

363 On average, the duplication hybrid lines had significantly higher courtship frequencies  
364 toward *D. simulans* females than toward F1 females (average CF = 35.86% for *D. simulans*  
365 females, average CF = 19.30% for F1 females,  $p = 5.43\text{E-}08$ ,  $N = 16$ ). This pattern is consistent  
366 with what we see for simX hybrids without X-linked duplications, which similarly courted *D.*  
367 *simulans* females more often than F1 females. However, courtship frequencies with both  
368 females are significantly higher for simX males compared to duplication hybrids (average simX  
369 CF with F1 females = 30%, Student's  $t = -3.3664$ ,  $df = 15$ ,  $p = 0.0042$ ; average simX CF with *D.*  
370 *simulans* females = 89%, Student's  $t = -12.891$ ,  $df = 15$ ,  $p = 1.614\text{e-}09$ ). In total, 15 of the 16  
371 duplication hybrid genotypes courted *D. simulans* with higher frequency than F1 females  
372 (Figure 3A, Table S2); three of these lines showed a significant preference for *D. simulans*  
373 females after correction for multiple tests ( $p = 0.0415$  for BSC296,  $p = 0.0061$  for BSC277, and  $p$   
374  $= 0.0437$ , for BSC200). Only one duplication hybrid strain, BSC100, courted F1 hybrids with  
375 higher frequency than *D. simulans* hybrids ( $p = 0.0136$ ). In general, the duplication hybrid  
376 strains courted *D. simulans* females with greater effort than F1 hybrid females (grand median  
377 CE = 17% for *D. simulans* females, and the grand median CE = 10% for F1 females,  $p = 8.78\text{E-}05$ ).  
378 Again, BSC100 duplication hybrids were the only hybrids to display higher courtship effort  
379 toward F1 females (CE = 30%) than toward *D. simulans* females (CE = 13.33%), although this  
380 difference was not significant after correcting for multiple comparisons ( $p = 0.0976$ , Figure 3B,  
381 Table S4).

382

### 383 ***BSC100 duplication hybrid males prefer females with the cuticular hydrocarbon 7,11-HD***

384 To verify that CHCs are involved in the courtship behaviors that BSC100 duplication hybrid  
385 males exhibited, we perfumed *D. simulans* females with 7,11-HD. When we observed BSC100  
386 duplication hybrid males with perfumed *D. simulans* females, we saw a significant increase in  
387 courtship frequency relative to sham-perfumed *D. simulans* females ( $p = 0.0400$ , Figure 3C,  
388 Table S2). BSC100 hybrid courtship frequency increased from 16% with *D. simulans* sham-  
389 perfumed females, to 40% with *D. simulans* females perfumed with 7,11-HD. Note, these

390 courtship frequencies are similar to those seen when BSC100 hybrid males were paired with *D.*  
391 *simulans* females (CF = 17.91%,  $p = 1$ ) and F1 females (CF = 45.07%,  $p = 0.8603$ ), respectively.  
392 Again, the courtship effort data supports this conclusion (Figure 3D). We observed significantly  
393 higher courtship effort toward *D. simulans* females perfumed with 7,11-HD (CE = 30%) when  
394 compared to sham-perfumed *D. simulans* females (CE = 3%,  $p = 0.0014$ ). Encouragingly, the  
395 courtship effort we observed toward 7,11-HD-perfumed *D. simulans* females is even higher  
396 than that of BSC100 hybrid male courtship effort toward F1 females ( $p = 0.0062$ ). Additionally,  
397 BSC100 hybrid males court sham-perfumed *D. simulans* and non-manipulated *D. simulans* with  
398 equal effort ( $p = 0.4451$ ).

399

#### 400 ***Fine-mapping the BSC100 region of the X chromosome***

401 The BSC100 X chromosome segment spans ~1.35 Mb, from position 11,557,017 to 12,903,175  
402 of the *D. melanogaster* X chromosome. This locus contains 159 genes (Table S1). To further  
403 refine this region, we measured the courtship behavior of 6 additional duplication hybrids  
404 heterozygous for various sections of the X chromosome within our region of interest (Figure 4A,  
405 Table 1B). The 6 overlapping duplication hybrids had an average courtship frequency of 42%  
406 with *D. simulans* and 20.22% with F1 females, comparable to the original 16 duplication  
407 hybrids. Five of the strains (BSC47, BSC49, BSC54, BSC315, and BSC317) had higher courtship  
408 frequencies with *D. simulans* females than with F1 females (Figure 4B, Table S2), with three  
409 (BSC49, BSC315, and BSC317) being significant ( $p = 0.0002$ ,  $p = 0.0462$ , and  $p = 0.0057$   
410 respectively). Overall, the overlapping duplication hybrid strains also displayed significantly  
411 higher courtship effort toward *D. simulans* females (CE = 20%) than toward F1 females (CE =  
412 12.5%,  $p = 0.0029$ ). The same three strains (BSC49, BSC315, and BSC317) that courted *D.*  
413 *simulans* females with higher frequencies than F1 females also displayed higher courtship effort  
414 towards *D. simulans* females ( $p = 0.0460$ ,  $p = 0.0408$ , and  $p = 0.0408$ , respectively).

415 A single strain, BSC101, displayed a different pattern than the others. Interestingly, this  
416 duplication segment spans 98% of the region covered by BSC100, while the other duplications  
417 cover various smaller portions of the region, ranging from 22% to 76% coverage (Figure 4A).  
418 BSC101 had a higher courtship frequency when paired with F1 females (CF = 37.04%) than

419 when paired with *D. simulans* females (CF = 29.63%), though not significantly so ( $p = 1$  after  
420 correcting for multiple comparisons). However, BSC101 duplication hybrids also did not differ  
421 from BSC100 duplication hybrids with respect to courtship frequency towards either *D.*  
422 *simulans* or F1 females ( $p = 0.2663$  and  $p = 0.5028$ , respectively). Likewise, BSC101 duplication  
423 hybrids were the only strain to display higher effort when paired with F1 females (CE = 26.67%)  
424 than when paired with *D. simulans* females (CE = 10%), though not significantly so ( $p = 0.2067$ ).  
425 These numbers are also comparable to the courtship effort of BSC100 males towards each  
426 female type.

427

### 428 **Testing candidate genes**

429 The BSC100 region is known to contain 159 genes (Table S1). To reduce this list to a testable  
430 number, we focused on genes with neurological functions and *fruitless* binding sites (see  
431 Methods). This produced 6 candidate genes: *papillote* (*pot*), *cacophony* (*cac*), *Tenascin-a* (*Ten-*  
432 *a*), *Smrtr* (*Smr*), *Ionotropic receptor 11a* (*Ir11a*), and *Phosphodiesterase 9* (*Pde9*, Figure 5). We  
433 used loss-of-function mutations or RNAi to investigate 5 of these 6 genes further  
434 (unfortunately, *pot* loss-of-function hybrid males were inviable).

435 For *Smr*, the hybrid cross between the *D. melanogaster* knockout strain produced  
436 balancer hybrid (melX males with the X chromosome intact) and *Smr*<sup>-</sup> hybrid males (melX males  
437 with the X chromosome lacking a functional *Smr* gene). *Smr* balancer hybrids courted *D.*  
438 *simulans* and *D. melanogaster* at similar frequencies ( $p = 1$ , Figure 6A, Table S2), and with  
439 similar efforts ( $p = 0.1136$ , Figure 6B). The same is true for *Smr*<sup>-</sup> hybrid males ( $p = 1$  for both CF  
440 and CE). However, these males courted both females at significantly higher frequencies than  
441 balancer hybrids ( $p = 0.0073$  for *D. simulans*, and  $p = 0.0135$  for *D. melanogaster*). Despite  
442 quantitative differences, both *Smr*<sup>-</sup> and balancer hybrid males show no preference for *D.*  
443 *melanogaster* or *D. simulans* females. Thus, there is no clear effect of the loss of *Smr* on male  
444 preference when compared to intact balancer hybrid males.

445 In contrast, *Ten-a* and *Pde9* are not held over a balancer, so hybrid crosses yield only  
446 knockout males. *Ten-a*<sup>-</sup> hybrids court both *D. simulans* and *D. melanogaster* at equal  
447 frequencies ( $p = 1$ ), and with similar effort ( $p = 1$ ). *Pde9*<sup>-</sup> hybrids court *D. melanogaster* at non-



448 significantly higher frequencies than *D. simulans* females ( $p = 0.2124$ ), and court both females  
449 with equal effort ( $p = 1$ ). In contrast, melX males with functioning copies of these genes court *D.*  
450 *melanogaster* females more frequently (and with non-significantly higher courtship effort).  
451 Although these knockout hybrids differ in some aspects from melX males, it is difficult to  
452 discern whether these differences are due to the different *D. melanogaster* strains with which  
453 these hybrids were made (see Discussion).

454 For *cac* and *Ir11a*, we compared the behavior of *D. melanogaster* RNAi knockdown flies  
455 (Figure 6E,F) to their siblings lacking knockdown (balancer). For *Ir11a*, we found that balancer  
456 males court *D. simulans* and *D. melanogaster* indiscriminately in terms of courtship frequency  
457 ( $p = 1$ ) and courtship effort ( $p = 1$ ). We found the same pattern for *cac* balancer males ( $p = 1$  for  
458 both CF and CE). While *Ir11a* RNAi males also courted *D. melanogaster* and *D. simulans* females  
459 at equal frequencies ( $p = 0.9032$ ), *cac* RNAi males had significantly lower courtship frequencies  
460 with *D. simulans* females than with *D. melanogaster* females ( $p = 1.34E-05$ ). Interestingly, both  
461 *Ir11a* and *cac* RNAi males displayed reduced effort toward *D. simulans* females compared to *D.*  
462 *melanogaster* females ( $p = 8.13E-06$  and  $p = 1.76E-05$ , respectively).

463 To test if the reduction in courtship frequency and effort of *cac* RNAi males with *D.*  
464 *simulans* female is driven by the absence of 7,11-HD on the *D. simulans* cuticle, we also  
465 observed *cac* RNAi and balancer males with sham- and 7,11-HD perfumed *D. simulans* (Figure  
466 7A,B). We found that 7,11-HD does indeed cause this effect: balancer hybrids court sham  
467 perfumed and 7,11-HD perfumed *D. simulans* with equal frequencies ( $p = 1$ ), and there was no  
468 significant difference in courtship effort ( $p = 0.5876$ ). In contrast, *cac* RNAi hybrids court 7,11-  
469 HD perfumed *D. simulans* at significantly higher frequency and effort than sham perfumed  
470 females ( $p = 3.91E-06$  for CF and  $p = 0.0027$  for CE). Thus, *cac* RNAi hybrids require 7,11-HD to  
471 stimulate high amounts of courtship.

472

## 473 Discussion

474 ***An important difference in male courtship preference between D. melanogaster and D.***  
475 ***simulans partially maps to the X chromosome***

476 Our observation of two *D. simulans* and two *D. melanogaster* strains confirms a previously  
477 described species difference in male courtship preference, where each species dramatically  
478 prefers their own females (Manning, 1959). While we did observe some variation in the  
479 quantitative amount of courtship among our lines (Figure 2A), the valence of male preference  
480 was always consistent within species. Because we also used females from two different lines,  
481 this variation in male behavior could be due to individual variation in female CHC quantity  
482 (Pardy et al., 2018), variation in other female traits, and/or variation in male preferences  
483 (Pischedda et al., 2014). Our results demonstrate that male courtship preferences act as a large  
484 reproductive barrier for *D. simulans* and *D. melanogaster*, as has been shown between *D.*  
485 *simulans* and *D. sechellia* (Shahandeh et al., 2018). A detailed understanding of the genetic  
486 basis of this preference would prove illuminating, not only with respect to the evolution of  
487 behavior, but also with respect to the evolution of reproductively isolating barriers.

488         The courtship data we collected using reciprocal *D. melanogaster*/*D. simulans* hybrids  
489 (melX and simX males) created in a homogenous background and controlled for cytoplasmic  
490 inheritance also confirms the significant role of the X chromosome in male courtship preference  
491 differences between these species (Kawanishi et al., 1981). Though we didn't strictly control for  
492 an effect of the Y chromosome, it is unlikely to explain our results because hybrids with the *D.*  
493 *simulans* Y behave more like *D. melanogaster*, and hybrids with the *D. melanogaster* Y behave  
494 more like *D. simulans*. Because we only used reciprocal hybrids to demonstrate the X-effect, we  
495 cannot rule out the potential of transgressive autosomal effects that cannot be detected in a  
496 hybrid background (Mittleman et al., 2017). Indeed, although the behavior of our hybrids  
497 qualitatively mirrors that of the X-donating parent, quantitative differences in both courtship  
498 frequency and effort, particularly between LH<sub>M</sub> and melX hybrids, suggest an additional role of  
499 autosomal loci (likely *D. simulans* dominant, as simX males behave both qualitatively and  
500 quantitatively similar to *D. simulans* males). These results mirror findings from a QTL study  
501 mapping male courtship frequency differences among *D. simulans* and *D. sechellia*, another  
502 species where females express 7,11-HD and males are stimulated to court by it (M.P.  
503 Shahandeh & T.L. Turner, in prep). In this case, the *D. simulans* X chromosome contributes to  
504 7,11-HD aversion, and autosomal *D. sechellia* loci contribute to 7,11-HD attraction. However, in

505 *D. simulans*-*D. sechellia* reciprocal hybrid males, the effects of the autosomal loci are far greater  
506 than the X chromosome, as both hybrids behave more similarly to *D. simulans* males. It remains  
507 to be seen whether the same loci affect 7,11-HD response between these species, but the  
508 effects/interactions of loci are undoubtedly different.

509

510 ***A single segment of the D. melanogaster X chromosome has a large effect on male***  
511 ***pheromone preference***

512 We expect all DP(1;Y) hybrid strains to behave like the simX hybrid strain, unless the  
513 duplicated *D. melanogaster* X chromosome segment harbors dominant or additive male  
514 preference loci, in which case they should behave more like melX hybrids. When paired with *D.*  
515 *melanogaster* females, however, we observed no courtship from the 15 DP(1;Y) hybrid strains  
516 we observed, which all behaved like simX males in this respect (the 16<sup>th</sup> unobserved duplication  
517 hybrid strain's CF and CE for *D. simulans* and F1 hybrids also follows this trend). This result is  
518 consistent with several possibilities, including: (1) the loci for male courtship preference reside  
519 in the 20% of the X chromosome not covered by the duplication hybrid strains, (2) *D.*  
520 *melanogaster* courtship preference alleles are recessive to, or epistatic with, *D. simulans* alleles,  
521 (3) the presence of Y-linked X translocations disrupts male behavior in general by making  
522 regions of the X chromosome heterozygous, and/or (4) the *D. melanogaster* allele is not  
523 expressed properly due to the genomic environment of the translocation. This last possibility is  
524 perhaps unlikely, as the duplications have been shown to rescue the loss of 94% of X-linked  
525 mutations (Cook et al., 2010).

526 Similar to our duplication hybrids, we never observed any of our *D. simulans* strains  
527 courting *D. melanogaster* females, but each courted F1 females at low levels (18% of all *D.*  
528 *simulans* males courted F1 females), suggesting they may display intermediate female cues.  
529 However, *D. simulans* males still strongly preferred *D. simulans* females over F1 hybrid females,  
530 likely due to the presence of 7,11-HD on the F1 female cuticle (Coyne, 1996), which suppresses  
531 courtship in *D. simulans* males (Billeter et al., 2009). This is also likely the reason that *D.*  
532 *melanogaster* males court F1 females comparably to *D. melanogaster* females. As with the male  
533 preference difference between *D. melanogaster* and *D. simulans* females, the preference

534 difference between *D. simulans* and F1 hybrid females still maps to the X chromosome: simX  
535 males behave like *D. simulans* males – courting F1 females infrequently, and significantly less  
536 frequently and with less effort, than *D. simulans* females (Figure 2). Likewise, melX males  
537 behave like *D. melanogaster*, courting F1 females with a similar frequency as *D. melanogaster*  
538 females, and significantly more frequently than *D. simulans* females. Because the overall  
539 preference patterns between *D. melanogaster* and *D. simulans* were replicated when we  
540 compared melX and simX male courtship towards F1 and *D. simulans* females, we additionally  
541 observed each of the 16 DP(1;Y) hybrid strains with F1 hybrid females. Again, we expect the  
542 courtship preferences of all DP(1;Y) hybrid strains to resemble the simX hybrid strain unless the  
543 duplicated *D. melanogaster* X chromosome segment harbors male preference loci, in which  
544 case we expect them to court F1 hybrid females at higher frequencies than *D. simulans* females,  
545 as we see for melX males.

546         When we observed hybrid males from the 16 DP(1;Y) genotypes, we found that some  
547 males from every strain courted F1 females. Most genotypes courted F1s at low levels, as we  
548 saw for simX hybrids. BSC100 hybrids were the only duplication hybrids that displayed higher  
549 courtship frequency and effort with F1 hybrids than with *D. simulans* females, replicating the  
550 pattern seen in melX hybrid males. However, like simX hybrids, BSC100 hybrids showed no  
551 courtship towards *D. melanogaster* females. The fact that BSC100 hybrid males prefer F1  
552 females to *D. simulans* females, but are still unwilling to court *D. melanogaster* females,  
553 suggests that the *D. melanogaster* variants at this locus are insufficient to completely mask the  
554 effects of the *D. simulans* X genome, which is also present in the BSC100 hybrid. We  
555 hypothesize that the greater courtship we see towards F1 hybrid females is not seen towards *D.*  
556 *melanogaster* females because the multiple, partially redundant cues that influence male  
557 courtship in *Drosophila* are more intermediate in F1 females (Arbuthnott et al., 2017). If there  
558 are multiple male preferences and female cues that have evolved, the BSC100 duplication may  
559 recover the *D. melanogaster* preference towards one signal, but still be insufficient to activate  
560 the P1 courtship command neurons because of inhibition on other sensory channels by the *D.*  
561 *simulans* genome (Clowney et al., 2015).

562 This hypothesis is supported by our perfuming data. Although past work has shown that  
563 the male preference difference between *D. melanogaster* and *D. simulans* is primarily dictated  
564 by female pheromones (Manning, 1959) – specifically 7,11-HD (Billeter et al., 2009) – we could  
565 not be sure that that BSC100 hybrid males were responding to this cue, especially because they  
566 were unwilling to court *D. melanogaster* females that also express this pheromone. However,  
567 we found that BSC100 hybrid males significantly preferred *D. simulans* females perfumed with  
568 7,11-HD to sham-perfumed females, and courted them at a frequency and effort comparable to  
569 what we saw with F1 hybrid females, which also have 7,11-HD on their cuticle. These results  
570 confirm the role of this X region in 7,11-HD response. Taken together, our findings demonstrate  
571 that a single 1.35 Mb segment of the X chromosome has a specific effect on the evolved 7,11-  
572 HD preference differences between *D. simulans* and *D. melanogaster*.

573

574 ***Subdividing this region for fine-mapping results in the loss of the significant preference***  
575 ***difference***

576 In order to further fine map the X chromosome region duplicated in BSC100 hybrids, we  
577 created 6 additional hybrid genotypes with partially overlapping duplicated segments (Table  
578 1B). When we observed these overlapping duplication hybrid strains, none showed the same  
579 pattern we observed for BSC100. Five of these had higher courtship frequencies with *D.*  
580 *simulans* females than with F1 females, just like simX males, although two of these differences  
581 were not significant. One strain, BSC101, did have a marginally higher CF and CE with F1  
582 females than *D. simulans* females, albeit non-significantly. This segment has the largest overlap,  
583 covering 98% of the segment in BSC100 hybrids (Figure 3C). We hypothesize 2 potential  
584 explanations for the loss of significant preference when this region was subdivided.

585 (1) *The genetic architecture of male courtship preference within this region is polygenic.*

586 It is possible that male courtship preference differences are polygenic— even if these genes are  
587 constrained within a single 1.35 Mb segment. In this case, subdivision of this locus may reduce  
588 the behavioral effect if these loci are additive, or result in its loss altogether if these loci have  
589 epistatic interactions. This possibility fits somewhat with the pattern we observe with our  
590 overlapping duplications: hybrids with the smaller overlapping segments have lost the

591 phenotype entirely, while the largest overlap appears to, at least partially, reproduce the  
592 phenotype. The simplest model that fits this scenario consists of at least two interacting loci, at  
593 either end of BSC100, such that all loci are never captured by any of the overlapping duplication  
594 hybrid strains. BSC101 overlaps 98% of BSC100. If this is indeed the case, then at least one locus  
595 must reside within the 2% not covered by BSC101. This type of genetic architecture is not  
596 uncommon. Many loci contributing to a single phenotype constrained within a single region  
597 have similarly been discovered for morphological traits in *Drosophila* and other organisms  
598 (Fanara et al., 2002; Harbison et al., 2004; Miller et al., 2014; Peichel & Marques, 2017).

599 (2) *Hybrid males heterozygous for regions of the X-chromosome behave differently than*  
600 *typical hybrids.* Overall, we observed reduced levels of courtship among our duplication hybrid  
601 strains compared to simX or melX hybrids, suggesting that the duplication hybrids behave  
602 differently from typical hybrids. The consistent reduction in courtship by duplication hybrids  
603 also reduces our statistical ability to detect a significant effect. We feel that abnormal behavior  
604 of duplication hybrids – particularly those carrying smaller subdivisions of the initial 16  
605 duplication segments, is the most likely explanation for why our attempts to fine-map the  
606 BSC100 region were unsuccessful.

607 Duplication hybrid males may behave differently for a variety of reasons; the most likely  
608 are those that stem from the Y-translocated X-duplication segments themselves. Males made  
609 heterozygous for regions of the X chromosome that are typically hemizygous may have  
610 abnormal behavior due to epistatic interactions between X chromosome loci. In the melX and  
611 simX hybrids, *D. melanogaster* and *D. simulans* X loci are not present in the same genetic  
612 background, but they are in duplication hybrids. These loci may interact in unpredictable, non-  
613 additive ways, having unforeseen effects on behavior. Alternatively, genes translocated from  
614 the X to the Y chromosome may have altered expression patterns due to their new genomic  
615 environment, producing a similar effect. Smaller segments, like those we used for fine-  
616 mapping, may be more susceptible to this problem, as genes contained within smaller  
617 translocated segments are more likely to be surrounded by a foreign genomic environment.

618 The panel of Y-linked X duplications we used to create duplication hybrids was also  
619 created using irradiation (Cook et al., 2010). In fact, each breakpoint was induced by irradiating

620 males, originally creating strains that contained large subdivisions of the X chromosome, like  
621 BSC100. Further subdivision of these regions (to create strains like BSC101 and all of the smaller  
622 subdivisions that we used for fine-mapping) required additional irradiation. This additional  
623 irradiation likely introduced new mutations to the genetic background of these flies, making  
624 comparisons between BSC100 and its subdividing strains, like BSC101, imperfect.

625 Finally, these duplication segments are marked with a dominant visible eye mutation,  
626 *Bar*, that substantially reduces the shape of the eye to a small sliver in males. These males likely  
627 have restricted fields of vision, and may have difficulty tracking females in the courtship arena,  
628 as has been shown for mutations affecting eye pigmentation (Connolly & Cook, 1973; Spiess &  
629 Schwer, 1978). Indeed, our data collectors noted during courtship observations that males  
630 often seemed to lose track of the females they were courting, and courtship would cease. This,  
631 too, likely contributed to the reduced courtship frequency and effort we observed, but is  
632 constant across all duplication hybrids. Regardless of the cause(s) of atypical behavior in our  
633 duplication hybrids, our failure to fine-map the BSC100 region must be considered in light of  
634 the above caveats.

635

### 636 ***Testing five candidate genes yields inconclusive results***

637 We were able to test five candidate genes we identified within the BSC100 region,  
638 either through the use of gene aberrations or RNAi knockdown. Qualitatively, our experiments  
639 using an *Smr* gene aberration suggest that the loss of *Smr* expression in a melX hybrid  
640 background has no effect on courtship behavior, as *Smr*<sup>-</sup> hybrids behaved like *Smr* balancer  
641 hybrids in that they court both *D. simulans* and *D. melanogaster* females at equal frequency  
642 and with equal effort. Quantitatively, however, *Smr*<sup>-</sup> hybrids showed higher overall courtship  
643 frequencies and efforts towards both females compared to balancer hybrids. This result  
644 suggests that males harboring an X chromosome balancer are less vigorous, and may behave  
645 atypically due to the presences of large inversions on a hemizygous sex chromosome. Thus,  
646 balancer hybrids are not an ideal comparison.

647 The results of our comparisons of *Ten-a*<sup>-</sup> and *Pde9*<sup>-</sup> hybrids are congruent with that of  
648 *Smr*<sup>-</sup> hybrids. *Ten-a*<sup>-</sup> and *Pde9*<sup>-</sup> hybrids also court both female types with equal frequency and

649 effort. There are, however, quantitative differences in the courtship frequencies of each hybrid,  
650 suggesting that *D. melanogaster* genetic background also influences male behavior (each has  
651 the same *D. simulans* background), making comparisons between strains imperfect.

652         Nonetheless, in courting indiscriminately, all three of these strains display a different  
653 overall pattern of courtship than intact melX males, which court *D. melanogaster* females at  
654 significantly higher frequencies than *D. simulans* females (melX males also display non-  
655 significantly higher efforts with *D. melanogaster* females). This may simply be because melX  
656 males were created using a different *D. melanogaster* background (LH<sub>M</sub>), and other *D.*  
657 *melanogaster* backgrounds may not discriminate as strongly (consistent with the *Smr* balancer  
658 hybrid data and RNAi/balancer data discussed below). In the case of *Ten-a*<sup>-</sup> hybrids, the *D.*  
659 *melanogaster* background is Canton-S, which also courts *D. melanogaster* more frequently than  
660 *D. simulans* females, and does not differ from LH<sub>M</sub> in this respect (Figure 2A). Thus, it may also  
661 be because each of these genes plays a small roll in reducing male preference for *D.*  
662 *melanogaster* females, and additively produce a much larger effect, like that seen with BSC100  
663 hybrids.

664         The results of our RNAi knockdown screen did identify one gene that, when knocked  
665 down, significantly changed male behavior: *cac*. Although there was a general effect of RNAi  
666 knockdown on courtship effort overall, only *cac* RNAi males showed reduced courtship  
667 frequency towards *D. simulans* females, while *Ir11a* RNAi males and both *cac* and *Ir11a*  
668 balancer males displayed high courtship frequencies to both species. Further, we've shown that  
669 this effect is driven by the lack of 7,11-HD on the *D. simulans* female cuticle, because when we  
670 add 7,11-HD synthetically, *cac* RNAi male courtship frequency and effort with *D. simulans*  
671 females return to high levels. This result is, at first, not entirely intuitive; the loss of expression  
672 of a *D. melanogaster* allele makes males behave comparatively *more* like *D. melanogaster*. We  
673 take this result to imply that *cac*, a calcium channel subunit expressed in neurons, is important  
674 to general signal transduction in the male CNS. Thus, the loss of *cac* expression results in  
675 difficulty activating P1 courtship neurons in the absence of multiple attractive stimuli, like 7,11-  
676 HD, that activate different pathways converging on P1 courtship neurons (Clowney et al., 2015).  
677 If anything, this result suggests that *cac* is neither necessary nor sufficient for 7,11-HD



678 response.

679           Ultimately, these results are difficult to interpret, because it is unclear what phenotypes  
680 to expect from a hemizygous male harboring a gene disruption. The only case where this test  
681 should yield a clear result is where the difference in behavior is attributable to a loss of function  
682 or expression in *D. simulans*. However, differences in phenotype can also be due to coding  
683 differences among genes, or differences in the amount, location, or timing of gene expression.  
684 In these cases, it is unclear what phenotypic change to expect from males completely lacking a  
685 gene altogether. While comparing gene aberrations from a *D. simulans* male may provide the  
686 reciprocal test (if phenotypic change is due to a loss in *D. melanogaster*), this test is still subject  
687 to all of the same problems discussed above. Additionally, it would require significant time and  
688 effort to create these aberrations, as none are currently available in *D. simulans* strains. This  
689 difficulty is specific to mapping male phenotypes on the X chromosome, as quantitative  
690 complementation (Turner, 2014) and reciprocal hemizyosity tests are not possible (Stern,  
691 2014).

692           It is important to note that we only tested five candidate genes. We selected these  
693 genes because they met specific criteria (see methods) that we believed made them likely  
694 candidates, and because screening 159 knockouts is too large an undertaking (we observed  
695 nearly 500 pairs of courting flies to test our 5 candidates). It is quite possible, then, that the  
696 gene(s) responsible are among those that did not meet our strict criteria. For instance, perhaps  
697 the gene(s) are expressed in the developing larvae, rather than the adult CNS. Alternatively,  
698 perhaps the gene(s) are not specific to the nervous system, and instead have a more general  
699 function. Finally, the gene(s) may not directly interact with *Fru*, and instead act downstream or  
700 independently of *Fru*.

701

## 702 **Conclusions**

703 Our results demonstrate that male courtship preference differences between *D. melanogaster*  
704 and *D. simulans* is at least partially explained by 1.35 Mb region of the X chromosome. We  
705 further show that this region responds to the presence of the *D. melanogaster* cuticular  
706 hydrocarbon pheromone, 7,11-HD. Unfortunately, attempts to fine-map this region were

707 unsuccessful using the DP(1;Y) hybrid method and a candidate gene approach. Because hybrid  
708 offspring of these species are sterile, we cannot pursue other avenues to map the causal loci,  
709 such as QTL mapping. Similarly, because males are hemizygous for the X chromosome, we  
710 cannot use large engineered chromosomal deletions (as in Laturney & Moehring, 2012; Pardy  
711 et al., 2018).

712         Still, our findings contribute to our understanding of the 7,11-HD preference phenotype.  
713 Although the neuronal circuitry required for 7,11-HD response in *D. melanogaster* has been  
714 known for some time (Clowney et al., 2015), it was just recently found that the same circuitry  
715 detects and responds to 7,11-HD in *D. simulans* (Seeholzer et al., 2018). While the anatomy of  
716 this circuit has remained constant during the divergence of these species, the valence of male  
717 response has undoubtedly changed – in large part due to changes in the interactions between  
718 these neurons, rather than their physical connections. It is still unclear what genetic changes  
719 are required to modify the interactions of these neurons, but our results provide a narrowed  
720 region of the genome with which to identify and continue to test candidates. Our results also  
721 highlight the difficulty of dissecting such a complex phenotype using a purely mapping  
722 approach. It is our hope that these data, when paired with functional dissection of the nervous  
723 system, can contribute to the identification of alleles explaining behavioral evolution. This is a  
724 necessary goal if we wish to understand the common patterns of genetic change underlying  
725 behavioral divergence.

726 **Literature cited**

727

728 Arbutnott, D., Fedina, T. Y., Pletcher, S. D., & Promislow, D. E. L. (2017). Mate choice in fruit  
729 flies is rational and adaptive. *Nature Communications*, *8*, 13953.

730 Auer, T. O., & Benton, R. (2016). Sexual circuitry in *Drosophila*. *Current Opinion in Neurobiology*,  
731 *38*, 18–26.

732 Auer, T. O., Khallaf, M. A., Silbering, A. F., Zappia, G., Ellis, K., Hansson, B. S., Jefferis, G. S. X. E.,  
733 Caron, S., & Benton, R. (2019). The making of an olfactory specialist. *BioRxiv*, 546507.

734 Bendesky, A., Kwon, Y. M., Lassance, J. M., Lewarch, C. L., Yao, S., Peterson, B. K., He, M. X.,  
735 Dulac, C., & Hoekstra, H. E. (2017). The genetic basis of parental care evolution in  
736 monogamous mice. *Nature*, *544*(7651), 434–439.

737 Billeter, J.-C., Atallah, J., Krupp, J. J., Millar, J. G., & Levine, J. D. (2009). Specialized cells tag  
738 sexual and species identity in *Drosophila melanogaster*. *Nature*, *461*(7266), 987–991.

739 Brideau, N. J., Flores, H. A., Wang, J., Maheshwari, S., Wang, X., & Barbash, D. A. (2006). Two  
740 Dobzhansky-Muller Genes interact to cause hybrid lethality in *Drosophila*. *Science*,  
741 *314*(5803), 1292–1295.

742 Cande, J., Prud'homme, B., & Gompel, N. (2013). Smells like evolution: The role of  
743 chemoreceptor evolution in behavioral change. *Current Opinion in Neurobiology*.

744 Cattani, V. M., & Presgraves, D. C. (2012). Incompatibility between X chromosome factor and  
745 pericentric heterochromatic region causes lethality in hybrids between *Drosophila*  
746 *melanogaster* and its sibling species. *Genetics*, *191*(2), 549–559.

747 Clowney, E. J., Iguchi, S., Bussell, J. J., Scheer, E., & Ruta, V. (2015). Multimodal Chemosensory  
748 Circuits Controlling Male Courtship in *Drosophila*. *Neuron*, *87*(5), 1036–1049.

749 Connolly, K., & Cook, R. (1973). Rejection responses by female *Drosophila melanogaster* - their  
750 ontogeny, causality and effects upon behavior of the courting male. *Behaviour*, *44*(1–2),  
751 142–166.

752 Cook, R. K., Deal, M. E., Deal, J. A., Garton, R. D., Brown, C. A., Ward, M. E., Andrade, R. S.,  
753 Spana, E. P., Kaufman, T. C., & Cook, K. R. (2010). A new resource for characterizing X-  
754 linked genes in *Drosophila melanogaster*: Systematic coverage and subdivision of the X  
755 chromosome with nested, Y-linked duplications. *Genetics*, *186*(4), 1095–1109.

756 Coyne, J. A. (1996). Genetics of Differences in Pheromonal Hydrocarbons Between *Drosophila*  
757 *melanogaster* and *D. simulans*. *Genetic Analysis*, *143*(1), 353–364.

758 Coyne, J. A., & Orr, H. A. (1997). Patterns of Speciation in *Drosophila* Revisited. *Evolution*, *51*(1),  
759 295–303.

760 Coyne, J. A., & Orr, H. A. (2004). *Speciation*. Sinauer Associates.

761 Dos Santos, G., Schroeder, A. J., Goodman, J. L., Strelets, V. B., Crosby, M. A., Thurmond, J., ...  
762 Grumbling, G. (2015). FlyBase: Introduction of the *Drosophila melanogaster* Release 6  
763 reference genome assembly and large-scale migration of genome annotations. *Nucleic*  
764 *Acids Research*, *43*(D1), D690–D697.

765 Edward, D. A., & Chapman, T. (2011). The evolution and significance of male mate choice.  
766 *Trends in Ecology and Evolution*.

767 Fanara, J. J., Robinson, K. O., Rollmann, S. M., Anholt, R. R. H., & Mackay, T. F. C. (2002). *Vanaso*  
768 is a candidate quantitative trait gene for *Drosophila* olfactory behavior. *Genetics*, *162*(3),

- 769 1321–1328.
- 770 Ferveur, J. F., & Sureau, G. (1996). Simultaneous influence on male courtship of stimulatory and  
771 inhibitory pheromones produced by live sex-mosaic *Drosophila melanogaster*. *Proceedings*  
772 *of the Royal Society B: Biological Sciences*, 263(1373), 967–973.
- 773 Goto, J., Mikawa, Y., Koganezawa, M., Ito, H., & Yamamoto, D. (2011). Sexually Dimorphic  
774 Shaping of Interneuron Dendrites Involves the Hunchback Transcription Factor. *Journal of*  
775 *Neuroscience*, 31(14), 5454–5459.
- 776 Gramates, L. S., Marygold, S. J., Dos Santos, G., Urbano, J. M., Antonazzo, G., Matthews, B. B., ...  
777 Baker, P. (2017). FlyBase at 25: Looking to the future. *Nucleic Acids Research*, 45(D1),  
778 D663–D671.
- 779 Graveley, B. R., Brooks, A. N., Carlson, J. W., Duff, M. O., Landolin, J. M., Yang, L., ... Celniker, S.  
780 E. (2011). supplements - The developmental transcriptome of *Drosophila melanogaster*.  
781 *Nature*, 471(7339), 473–9.
- 782 Harbison, S. T., Yamamoto, A. H., Fanara, J. J., Norga, K. K., & Mackay, T. F. C. (2004).  
783 Quantitative Trait Loci Affecting Starvation Resistance in *Drosophila melanogaster*.  
784 *Genetics*, 166(4), 1807–1823.
- 785 Holm, S. (1979). A Simple Sequentially Rejective Multiple Test Procedure. *Scandinavian Journal*  
786 *of Statistics Scand J Statist*, 6(6), 65–70.
- 787 Jallon, J.-M., & David, J. R. (1987). Variation in cuticular hydrocarbons among the eight species  
788 of the *Drosophila melanogaster* subgroup. *Evolution*, 41(2), 294–302.
- 789 Kawanishi, M., & Watanabe, T. K. (1981). GENES AFFECTING COURTSHIP SONG AND MATING  
790 PREFERENCE IN *DROSOPHILA-MELANOGASTER*, *DROSOPHILA-SIMULANS* AND THEIR  
791 HYBRIDS. *Evolution*, 35(6), 1128–1133.
- 792 Kittelmann, S., Buffry, A. D., Almudi, I., Yoth, M., Sabaris, G., Franziska, A., Couso, J. P., Nunes,  
793 M. D. S., Frankel, N., Gómez-skarmeta, J. L., & Pueyo, J. (2017). Gene regulatory network  
794 architecture in different developmental contexts influences the genetic basis of  
795 morphological evolution. *PLOS Genetics*, 14(5), 1–20.
- 796 Kocher, S. D., Mallarino, R., Rubin, B. E. R., Yu, D. W., Hoekstra, H. E., & Pierce, N. E. (2018). The  
797 genetic basis of a social polymorphism in halictid bees. *Nature Communications*, 9(1),  
798 4338.
- 799 Kopp, A. (2009). Metamodels and phylogenetic replication: A systematic approach to the  
800 evolution of developmental pathways. *Evolution*, 63(11), 2771–2789.
- 801 Laturney, M., & Moehring, A. J. (2012). Fine-scale genetic analysis of species-specific female  
802 preference in *Drosophila simulans*. *Journal of Evolutionary Biology*, 25(9), 1718–1731.
- 803 Leary, G. P., Allen, J. E., Bunker, P. L., Luginbill, J. B., Linn, C. E., Macallister, I. E., Kavanaugh, M.  
804 P., & Wanner, K. W. (2012). Single mutation to a sex pheromone receptor provides  
805 adaptive specificity between closely related moth species. *Proceedings of the National*  
806 *Academy of Sciences*, 109(35), 14081–14086.
- 807 Lu, B., LaMora, A., Sun, Y., Welsh, M. J., & Ben-Shahar, Y. (2012). ppk23-Dependent  
808 chemosensory functions contribute to courtship behavior in *Drosophila melanogaster*.  
809 *PLoS Genetics*, 8(3), e1002587.
- 810 Lu, B., Zelle, K. M., Seltzer, R., Hefetz, A., Ben-Shahar, Y., Amirav, A., ... Kravitz, E. A. (2014).  
811 Feminization of pheromone-sensing neurons affects mating decisions in *Drosophila* males.  
812 *Biology Open*, 3(2), 152–60.

- 813 MacKay, T. F. C., Richards, S., Stone, E. A., Barbadilla, A., Ayroles, J. F., Zhu, D., ... Gibbs, R. A.  
814 (2012). The *Drosophila melanogaster* Genetic Reference Panel. *Nature*, 482(7384), 173–  
815 178.
- 816 Manning, A. (1959). The sexual isolation between *Drosophila melanogaster* and *Drosophila*  
817 *simulans*. *Animal Behaviour*, 7(1–2), 60–65.
- 818 Manoli, D. S., Foss, M., Villella, A., Taylor, B. J., Hall, J. C., & Baker, B. S. (2005). Male-specific  
819 fruitless specifies the neural substrates of *Drosophila* courtship behaviour. *Nature*,  
820 436(7049), 395.
- 821 Martin, A., & Orgogozo, V. (2013). The loci of repeated evolution: A catalog of genetic hotspots  
822 of phenotypic variation. *Evolution*, 67(5), 1235–1250.
- 823 McBride, C. S. (2007). Rapid evolution of smell and taste receptor genes during host  
824 specialization in *Drosophila sechellia*. *Proceedings of the National Academy of Sciences of*  
825 *the United States of America*, 104(12), 4996–5001.
- 826 McBride, C. S., Baier, F., Omondi, A. B., Spitzer, S. A., Lutomiah, J., Sang, R., Ignell, R., & Vosshall,  
827 L. B. (2014). Evolution of mosquito preference for humans linked to an odorant receptor.  
828 *Nature*, 515(7526), 222–227.
- 829 Miller, C. T., Glazer, A. M., Summers, B. R., Blackman, B. K., Norman, A. R., Shapiro, M. D., Cole,  
830 B. L., Peichel, C. L., Schluter, D., & Kingsley, D. M. (2014). Modular skeletal evolution in  
831 sticklebacks is controlled by additive and clustered quantitative trait loci. *Genetics*, 197(1),  
832 405–420.
- 833 Mittleman, B. E., Manzano-Winkler, B., Hall, J. B., Korunes, K. L., & Noor, M. A. F. (2017). The  
834 large X-effect on secondary sexual characters and the genetics of variation in sex comb  
835 tooth number in *Drosophila subobscura*. *Ecology and Evolution*, 7(2), 533–540.
- 836 Moehring, A. J., & Mackay, T. F. C. (2004). The Quantitative Genetic Basis of Male Mating  
837 Behavior in *Drosophila melanogaster*. *Genetics*, 167(3).
- 838 Orgogozo, V., & Martin, A. (2013). Data from: The loci of repeated evolution: a catalogue of  
839 genetic hotspots of phenotypic variation. *Dryad Digital Repository*.
- 840 Pardy, J. A., Rundle, H. D., Bernards, M. A., & Moehring, A. J. (2018). The genetic basis of female  
841 pheromone differences between *Drosophila melanogaster* and *D. simulans*. *Heredity*, 1.
- 842 Peichel, C. L., & Marques, D. A. (2017, February 5). The genetic and molecular architecture of  
843 phenotypic diversity in sticklebacks. *Philosophical Transactions of the Royal Society B:*  
844 *Biological Sciences*. The Royal Society.
- 845 Perkins, L. A., Holderbaum, L., Tao, R., Hu, Y., Sopko, R., McCall, K., ... Perrimon, N. (2015). The  
846 transgenic RNAi project at Harvard medical school: Resources and validation. *Genetics*,  
847 201(3), 843–852.
- 848 Pischedda, A., Shahandeh, M. P., Cochrane, W. G., Cochrane, V. A., & Turner, T. L. (2014).  
849 Natural variation in the strength and direction of male mating preferences for female  
850 pheromones in *Drosophila melanogaster*. *PLoS ONE*, 9(1), e87509.
- 851 Rebeiz, M., & Williams, T. M. (2017, February 1). Using *Drosophila* pigmentation traits to study  
852 the mechanisms of cis-regulatory evolution. *Current Opinion in Insect Science*. Elsevier.
- 853 Rice, W. R. (1990). A Consensus Combined P-Value Test and the Family-Wide Significance of  
854 Component Tests. *Biometrics*, 46(2), 303.
- 855 Rice, W. R., Linder, J. E., Friberg, U., Lew, T. A., Morrow, E. H., & Stewart, A. D. (2005). Inter-  
856 locus antagonistic coevolution as an engine of speciation: Assessment with hemiclinal

- 857 analysis. *Proceedings of the National Academy of Sciences*, 102(Supplement 1), 6527–  
858 6534.
- 859 Rockman, M. V. (2012). The QTN program and the alleles that matter for evolution: All that’s  
860 gold does not glitter. *Evolution*.
- 861 Ryder, E., Blows, F., Ashburner, M., Bautista-Llacer, R., Coulson, D., Drummond, J., ... Russell, S.  
862 (2004). The DrosDel collection: A set of P-element insertions for generating custom  
863 chromosomal aberrations in *Drosophila melanogaster*. *Genetics*, 167(2), 797–813.
- 864 Seeholzer, L. F., Seppo, M., Stern, D. L., & Ruta, V. (2018). Evolution of a central neural circuit  
865 underlies *Drosophila* mate preferences. *Nature*, 559(7715), 564–569.
- 866 Shahandeh, M. P., Pischedda, A., & Turner, T. L. (2018). Male mate choice via cuticular  
867 hydrocarbon pheromones drives reproductive isolation between *Drosophila* species.  
868 *Evolution*, 72(1), 123–135.
- 869 Shirangi, T. R., Dufour, H. D., Williams, T. M., & Carroll, S. B. (2009). Rapid evolution of sex  
870 pheromone-producing enzyme expression in *Drosophila*. *PLoS Biology*, 7(8), e1000168.
- 871 Spiess, E. B., & Schwer, W. A. (1978). Minority mating advantage of certain eye color mutants  
872 of *Drosophila melanogaster*. I. Multiple-choice and single-female tests. *Behavior Genetics*,  
873 8(2), 155–168.
- 874 Stern, D. L. (2014). Identification of loci that cause phenotypic variation in diverse species with  
875 the reciprocal hemizyosity test. *Trends in Genetics*.
- 876 Stern, D. L., & Orgogozo, V. (2008). The loci of evolution: How predictable is genetic evolution?  
877 *Evolution*.
- 878 Stern, D. L., Orgogozo, V., Martin, A., Hines, H. M., Counterman, B. A., Pardo-Diaz, C., Jiggins, C.  
879 D., Chamberlain, N. L., Kronforst, M. R., Chen, R., Halder, G., Nijhout, H. F., & McMillan, W.  
880 O. (2009). Is genetic evolution predictable? *Science (New York, N.Y.)*, 323(5915), 746–51.
- 881 Thistle, R., Cameron, P., Ghorayshi, A., Dennison, L., & Scott, K. (2012). Contact chemoreceptors  
882 mediate male-male repulsion and male-female attraction during *Drosophila* courtship. *Cell*,  
883 149(5), 1140–51.
- 884 Toda, H., Zhao, X., & Dickson, B. J. (2012). The *Drosophila* female aphrodisiac pheromone  
885 activates ppk23(+) sensory neurons to elicit male courtship behavior. *Cell Reports*, 1(6),  
886 599–607.
- 887 Turner, T. L. (2014). Fine-mapping natural alleles: quantitative complementation to the rescue.  
888 *Molecular Ecology*, 23(10), 2377–82.
- 889 Vernes, S. C. (2014). Genome wide identification of Fruitless targets suggests a role in  
890 upregulating genes important for neural circuit formation. *Scientific Reports*, 4.
- 891 Watanabe, T. K. (1979). A gene that rescues the lethal hybrids between *Drosophila*  
892 *melanogaster* and *D. simulans*. *The Japanese Journal of Genetics*, 54(5), 325–331.
- 893

**Table 1. DP(1;Y) *D. melanogaster* stocks. 1A.** The 16 Y-linked X duplication strains used to create duplication hybrids and the reported breakpoints of their Y-linked X duplication segment (if multiple segments, base pairs are indicated for each). Ranges are shown for breakpoints where precise estimation is not available. **1B.** The 6 Y-linked X duplication strains used to create duplication hybrids overlapping the region covered by BSC100 and the reported breakpoints of their Y-linked X duplication segment. Note, all translocations contain a basal segment of the X chromosome (X:1;X:493529), and many also contain a region from the end of the X chromosome (ex: X:21572099-22456281). Coordinates of translocated segments are from *D. melanogaster* genome release 6 (Dos Santos et al., 2015).

**Table 1A DP(1;Y) strains and breakpoints**

| Duplication | DP(X:Start;X:Finish)                                                        |
|-------------|-----------------------------------------------------------------------------|
| BSC297      | X:1;X:1947870-2009846                                                       |
| BSC74       | X:1922620-2009846;X:3689139 & X:1;X:493529                                  |
| BSC158      | X:3842645-3949866;X:4931440-4931826 & X:1;X:493529                          |
| BSC277      | X:4919037-5430041;X:6695007 & X:1;X:523278                                  |
| BSC33       | X:8129732-8192725;X:9030055 & X:1;X:493529                                  |
| BSC170      | X:8589125-8688160;X:9686653 & X:1;X:493529                                  |
| BSC58       | X:9355691-9500067;X:10744934 & X:1;X:493529                                 |
| BSC264      | X:11136887-11168928;X:11453958 & X:21572099-22456281;h28-h29 & X:1;X:493529 |
| BSC100      | X:11453063-11557017;X:12903175 & X:21572099-22456281;h28-h29 & X:1;X:493529 |
| BSC267      | X:13762300-13830297;X:15498953 & X:1;X:493529                               |
| BSC266      | X:15484325-15569994;X:16091666 & X:1;X:493529                               |
| BSC228      | X:15982454-16005803;X:16655817 & X:1;X:493529                               |
| BSC200      | X:16533041-16610393;X:17682814 & X:1;X:493529                               |
| BSC68       | X:17698398-17842622;X:18506941 & X:1;X:493529                               |
| BSC129      | X:18506719-18632082;X:19887155 & X:1;X:493529                               |
| BSC276      | X:20393272-20429518;h28-h29 & X:1;X:361245-493529                           |

**Table 1B Overlap BSC100**

| Duplication | DP(X:Start;X:Finish)                                                        |
|-------------|-----------------------------------------------------------------------------|
| BSC47       | X:11325824-11349993;X:12007087 & X:21318903-21382540;h28-h29 & X:1;X:493529 |
| BSC49       | X:11409964-11453063;X:12007087 & X:1;X:493529                               |
| BSC54       | X:11580188-11706436;X:12007087 & X:21572099-22456281;h28-h29 & X:1;X:493529 |
| BSC101      | X:11557017-11580188;X:12903175 & X:1;X:493529                               |
| BBSC315     | X:11839318-11881910;X:13284291 & X:1;X:493529                               |
| BSC317      | X:12006937-12107815;X:13284291 & X:1;X:493529                               |

**Table 2. A.** A list of the available Bloomington *Drosophila* Stock Center gene aberration strains used to test candidate genes. **B.** A list of UAS-hairpin RNAi and pan-neuronal Gal4 drivers used to knockdown expression of genes when aberrations were available, or when aberrations were male lethal.

| <b>Table 2A. Gene aberrations for candidate genes</b> |                                        |                                                                                                        |
|-------------------------------------------------------|----------------------------------------|--------------------------------------------------------------------------------------------------------|
| <b>BDSC #</b>                                         | <b>Gene target</b>                     | <b>genotype</b>                                                                                        |
| 57114                                                 | <i>papillote (pot)</i>                 | y[1] w[*] pot[D] P{ry[+t7.2]=neoFRT}19A/FM7c, P{w[+mC]=GAL4-Kr.C}DC1, P{w[+mC]=UAS-GFP.S65T}DC5, sn[+] |
| 13116                                                 | <i>Smrtr (Smr)</i>                     | w[1118] P{w[+mGT]=GT1}Smr[BG01648]/FM7a                                                                |
| 42195                                                 | <i>Phosphodiesterase 9 (Pde9)</i>      | y[1] w[*]; Mi{y[+mDint2]=MIC}Pde9[MI06972]                                                             |
| 35826                                                 | <i>Tenascin-a (Ten-a)</i>              | Ten-a[cbd-KS171] introgressed into a CantonS background                                                |
| <b>Table 2B. Strains used for RNAi knockdown</b>      |                                        |                                                                                                        |
| <b>BDSC #</b>                                         | <b>Gene target</b>                     | <b>genotype</b>                                                                                        |
| 27244                                                 | <i>cacophony (cac)</i>                 | y[1] v[1]; P{y[+t7.7] v[+t1.8]=TRiP.JF02572}attP2                                                      |
| 61898                                                 | <i>Ionotropic receptor 11a (Ir11a)</i> | y[1] v[1]; P{y[+t7.7] v[+t1.8]=TRiP.HMJ23453}attP40                                                    |
| 8765                                                  | Elav-Gal4                              | P{w[+mC]=GAL4-elav.L}2/CyO                                                                             |



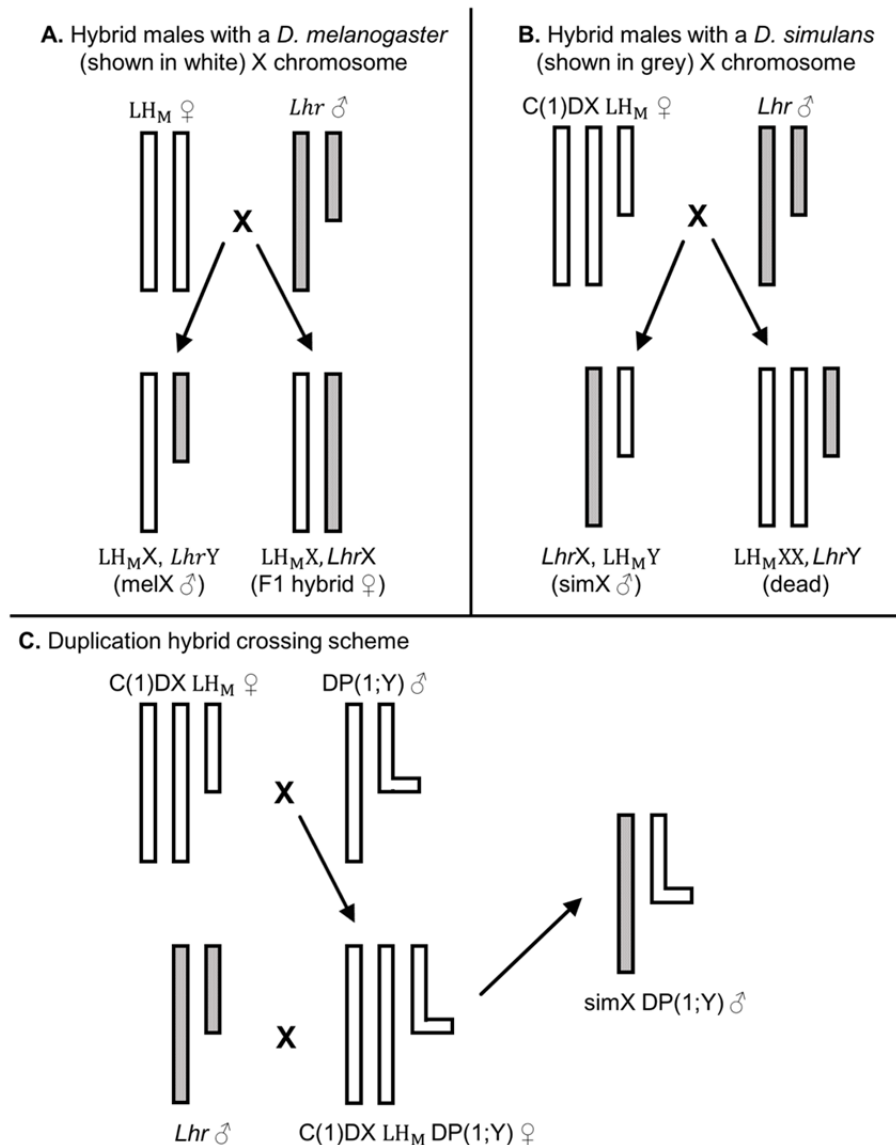

**Figure 1. Hybrid crossing schemes.** Each diagram shows only the sex chromosomes. Y chromosomes are depicted as shorter, while Y chromosomes with X duplications are depicted as an “L”. *D. melanogaster* ( $LH_M$ ) chromosomes are shown in white, and *D. simulans* ( $Lhr$ ) chromosomes are shown in grey. **A.** To create melX hybrids, we crossed  $LH_M$  females to  $Lhr$  males, resulting in hybrid males with the *D. melanogaster* X chromosome and F1 hybrid females. **B.** To create simX hybrids, we crossed C(1)DX- $LH_M$  females to  $Lhr$  males, resulting in hybrid males with the *D. simulans* X chromosome. Females of this cross are inviable. **C.** To create duplication hybrids, we first crossed males from DP(1;Y) strains to C(1)DX $LH_M$  females. We took the female offspring of this first cross and crossed them to  $Lhr$  males. The male offspring of this second cross inherit the *D. simulans* X chromosome in addition to a segment of the *D. melanogaster* X chromosome (depicted by the small horizontal bar) attached to the *D. melanogaster* Y chromosome.

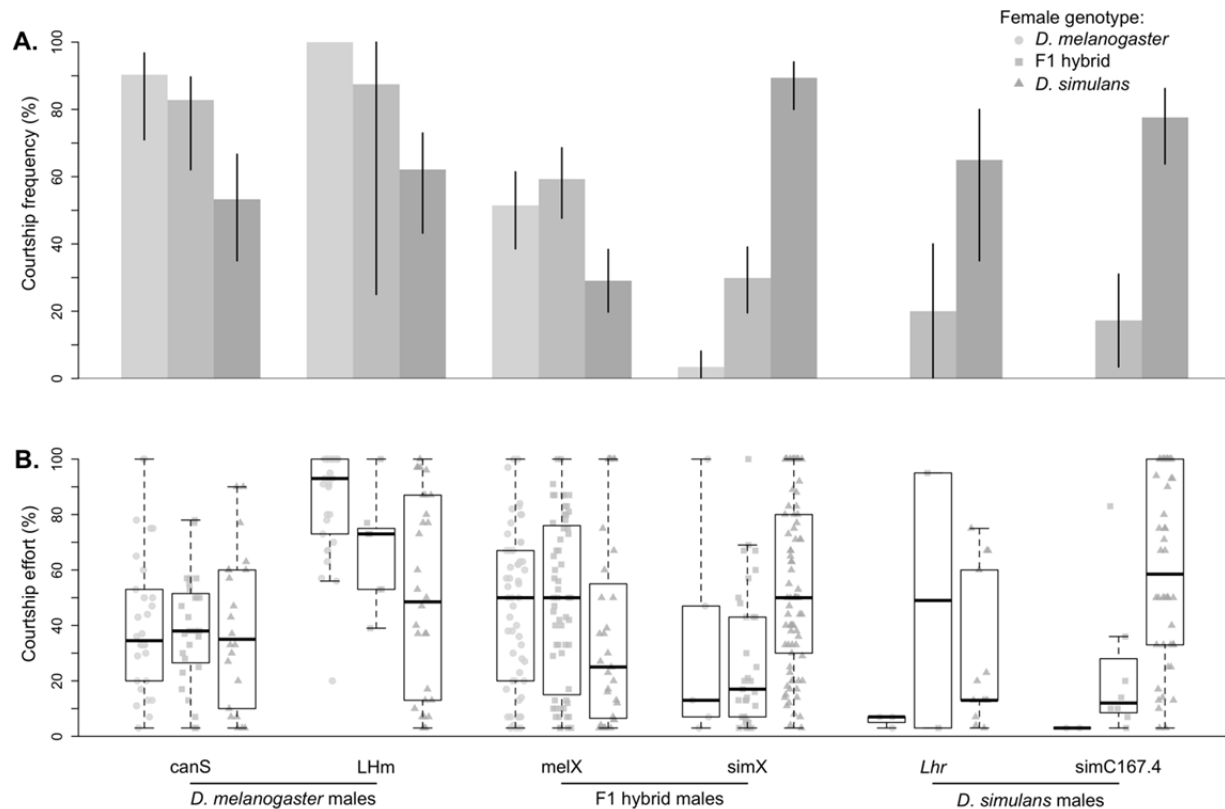

**Figure 2. Courtship behaviors of *D. melanogaster* males, *D. simulans* males, and their hybrids.** **A.** Courtship frequencies are shown for two strains of *D. melanogaster* (Canton-S and LH<sub>M</sub>), two strains of *D. simulans* (*Lhr* and simC167.4), and their reciprocal hybrids (melX and simX) toward three female types: *D. melanogaster* (light grey), *D. simulans* (grey), and F1 hybrids (dark grey). Whiskers represent 95% bias corrected and accelerated bootstrapped confidence intervals. **B.** Courtship effort is shown for the same male and female combinations. Courtship effort is calculated as the percent of time that males spent courting (only males that courted were included in these calculations). Boxplots show the median (bold black line), interquartile range (box) and full extent of the data excluding outliers (whiskers).

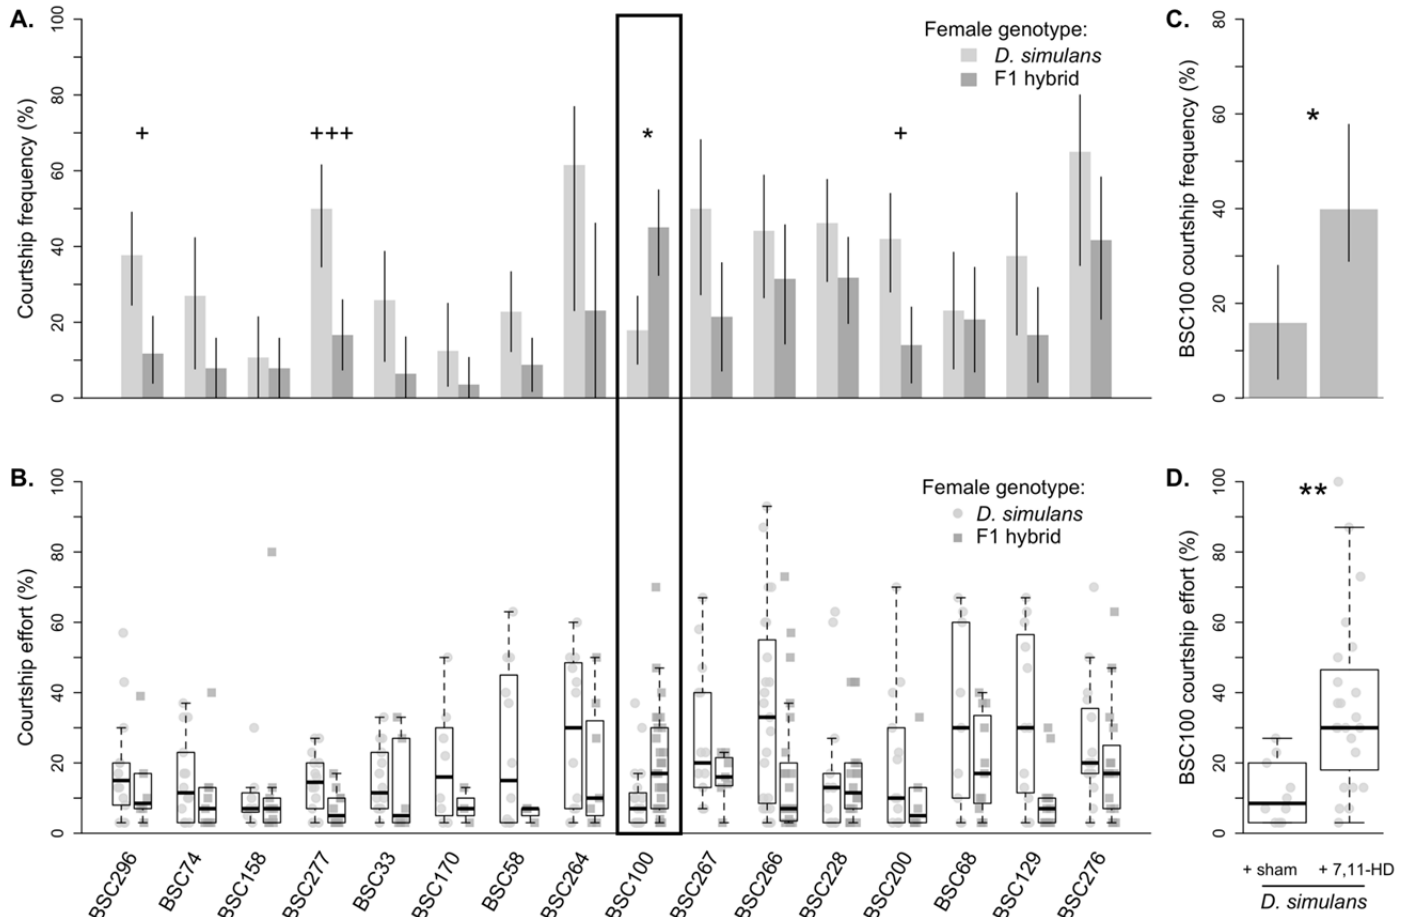

**Figure 3. Courtship behaviors of duplication hybrid males.** **A.** The courtship frequencies for each of the 16 duplication hybrids when paired with both *D. simulans* females (light grey) and F1 females (dark grey). **B.** The courtship effort for each of the 16 duplication hybrids when paired with *D. simulans* females (light grey circles, left) and F1 females (dark grey squares, right). BSC100, the only duplication to display greater courtship frequency and effort towards F1 hybrids over *D. simulans* females is enclosed within the black box. **C.** The frequency of BSC100 males that courted sham-perfumed *D. simulans* females (left), and *D. simulans* females perfumed with synthetic 7,11-HD (right). **D.** The courtship effort of BSC100 males that courted sham-perfumed *D. simulans* females (light grey circles, left), and *D. simulans* females perfumed with synthetic 7,11-HD (dark grey squares, right). For all, symbols denote degree of significance after correction for multiple comparisons (\* =  $p < 0.05$ , \*\* =  $p < 0.01$ , and \*\*\* =  $p < 0.001$ ). Asterisks mark duplication hybrid lines that court F1 hybrid females significantly more. Plus signs mark duplication hybrid lines that court *D. simulans* females more. For A. and C., whiskers represent 95% bias corrected and accelerated bootstrapped confidence intervals. For B. and D., boxplots show the median (bold black line), interquartile range (box) and full extent of the data excluding outliers (whiskers).

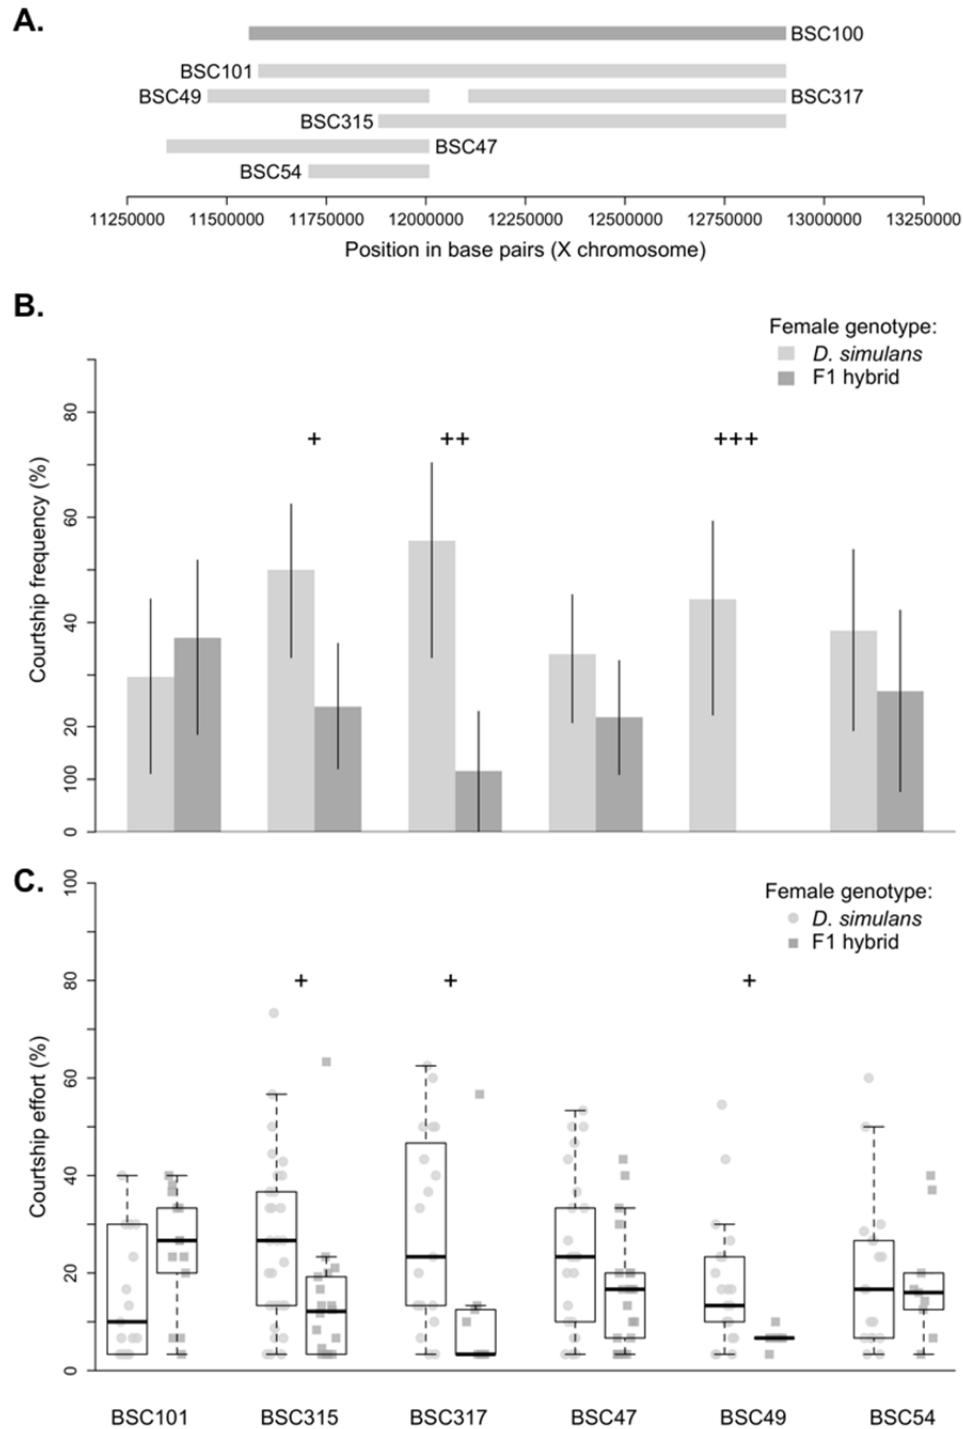

**Figure 4. Courtship behaviors of BSC100 overlapping duplication hybrid males. A.** The physical positions of the original duplication hybrid (BSC100), and the six partially overlapping strains we assayed to fine-map the region. **B.** The courtship frequencies for each of the 6 overlapping duplication hybrids when paired with both *D. simulans* females (light grey) and F1 females (dark grey). Whiskers represent 95% bias corrected and accelerated bootstrapped confidence intervals. **C.** The courtship effort for each of the 6 overlapping duplication hybrids when paired

with *D. simulans* females (light grey circles, left) and F1 females (dark grey squares, right). Boxplots show the median (bold black line), interquartile range (box) and full extent of the data excluding outliers (whiskers). For all, plus signs mark duplication hybrid lines that court *D. simulans* females more, and denote degree of significance after correction for multiple comparisons (+ =  $p < 0.05$ , ++ =  $p < 0.01$ , and +++ =  $p < 0.001$ ).

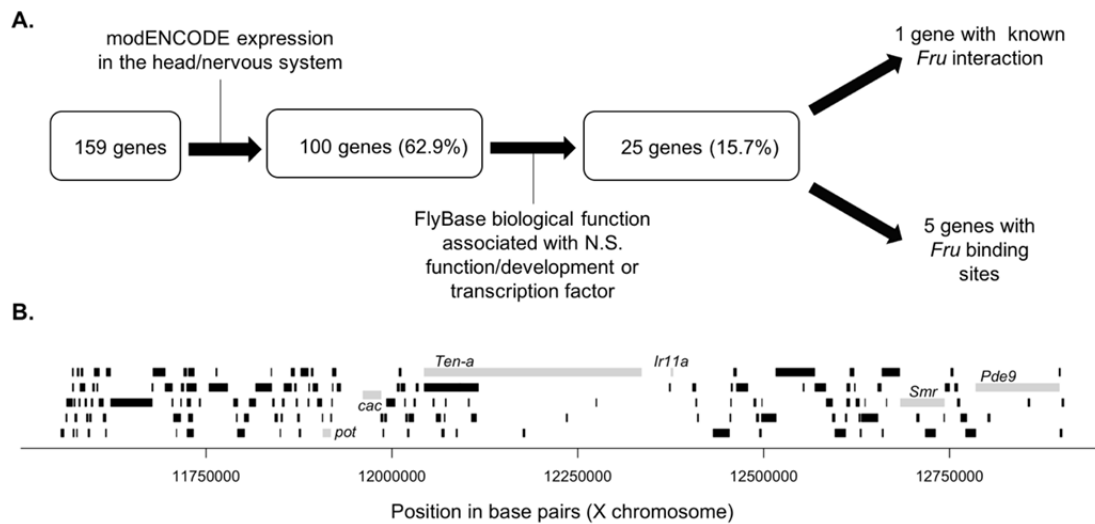

**Figure 5. The 159 genes uncovered by BSC100. A.** A pipeline for identifying relevant candidate genes among the 159 covered by BSC100. We expect genes to be expressed in the central nervous system and to have nervous system functions (or act as transcription factors for loci with such functions). Because *Fruitless* is important to wiring the male nervous system, we also looked for specific genes that interact with *Fru* as particularly strong candidates. **B.** A schematic of the 150 genes. The 6 genes that meet our filtering criteria are relatively evenly distributed across the region and shown in grey.

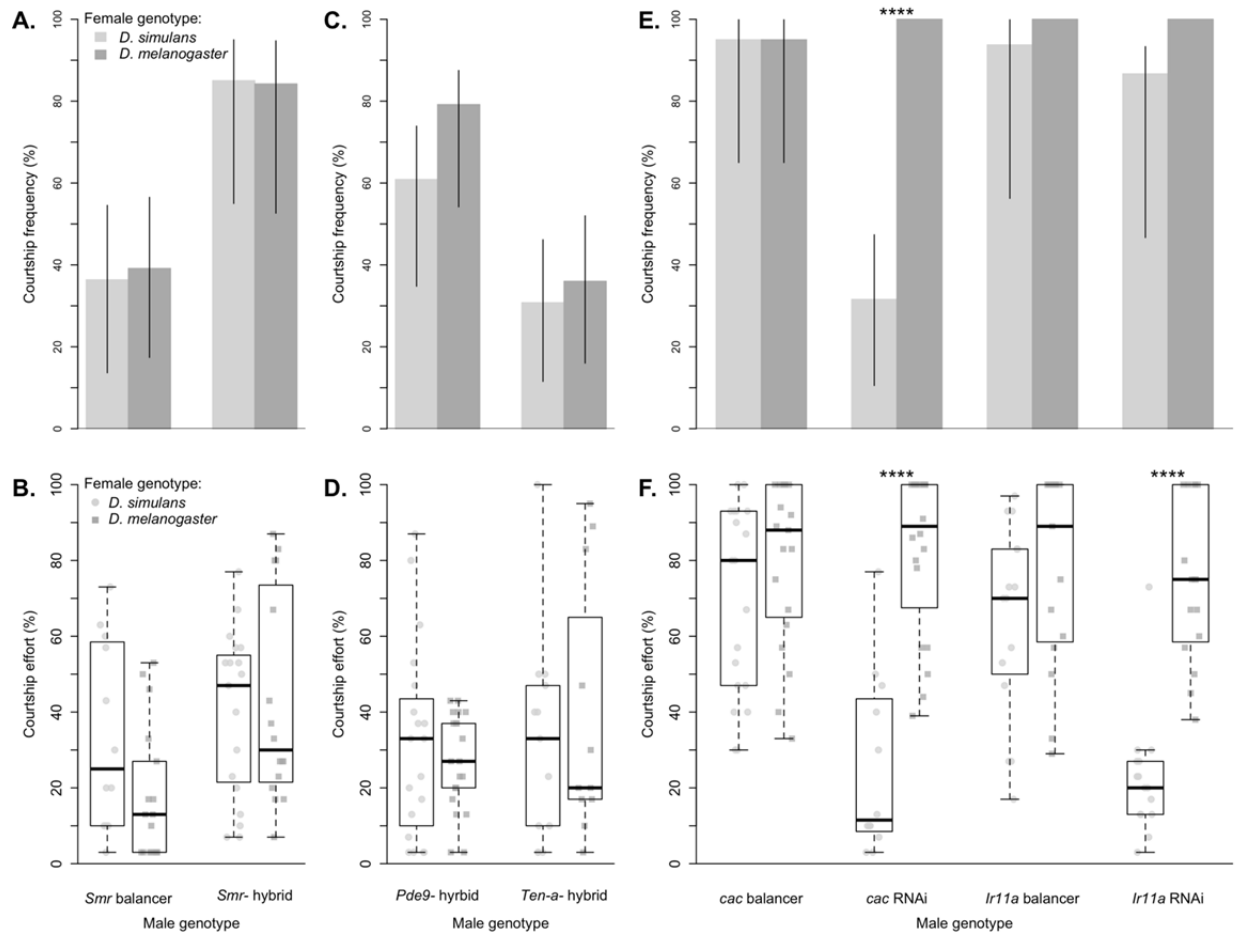

**Figure 6. The courtship behaviors of RNAi knockdown and *D. melanogaster* X chromosome hybrids with individual gene knockouts.** **A.** The courtship frequency of *Smr* knockout hybrid males (*Smr* hybrid) is compared to *Smr* X chromosome balancer males (*Smr* balancer). **B.** The courtship effort of *Smr* knockout hybrid males (*Smr* hybrid) is compared to *Smr* X chromosome balancer males (*Smr* balancer). **C.** The courtship frequency for *Pde9* and *Ten-a* knockout hybrid males. **D.** The courtship effort for *Pde9* and *Ten-a* knockout hybrid males. **E.** The courtship frequency of RNAi knockdown and balancer genotypes for two genes, *cac* and *Ir11a* for males paired with *D. simulans* females (light grey bars) and *D. melanogaster* females (dark grey bars). **F.** The courtship effort of RNAi knockdown and balancer genotypes for two genes, *cac* and *Ir11a* for males paired with *D. simulans* females (light grey points) and *D. melanogaster* females (dark grey points). For A., C., and E., whiskers represent 95% bias corrected and accelerated bootstrapped confidence intervals. For B., D., and F., boxplots show the median (bold black line), interquartile range (box) and full extent of the data excluding outliers (whiskers). Asterisks denote degree of significance after correction for multiple comparisons (\*\*\*\* = p < 0.0001).

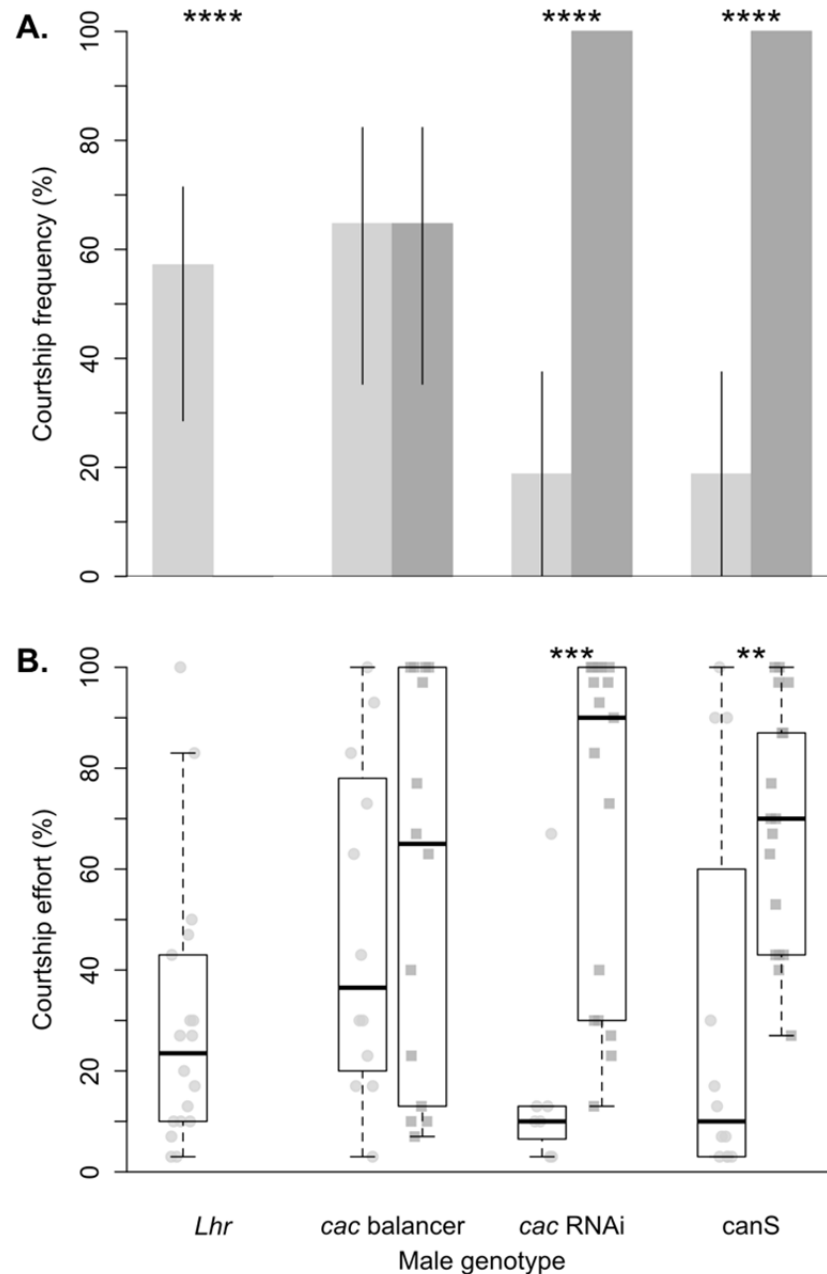

**Figure 7. *cac* RNAi male behavior is driven by 7,11-HD.** **A.** The courtship frequency of RNAi knock down and balancer genotypes for *cac*, *Lhr*, and Canton-S (*canS*) for males paired with *D. simulans* females (light grey bars) and *D. melanogaster* females (dark grey bars). Whiskers represent 95% bias corrected and accelerated bootstrapped confidence intervals. **B.** The courtship effort of RNAi knockdown and balancer genotypes for *cac*, *Lhr*, and *canS* for males paired with *D. simulans* females (light grey circles) and *D. melanogaster* females (dark grey squares). Boxplots show the median (bold black line), interquartile range (box) and full extent of the data excluding outliers (whiskers). For all, asterisks denote degree of significance after correction for multiple comparisons (\*\* = p < 0.01, and \*\*\* = p < 0.001, \*\*\*\* = p < 0.0001).

## Supplementary information

**Table S3 Crosses of *pot* aberrant *D. melanogaster* to *D. simulans* yields no offspring.** We crossed *D. melanogaster pot* aberrant females to *D. simulans Lhr* males using the crossing methods described in the main text three separate times. This table shows the offspring count for female, balancer male, and *pot*<sup>-</sup> male offspring. No cross produced *pot*<sup>-</sup> offspring and only two *pot* balancer males resulted from all three crosses.

| <b>Table S3</b><br>Cross<br>(female x male) | <b>Offspring #</b> |                               |                       |
|---------------------------------------------|--------------------|-------------------------------|-----------------------|
|                                             | females            | <i>pot</i> <sup>-</sup> males | <i>pot</i> bal. males |
| <i>pot</i> x <i>Lhr</i> -1                  | 43                 | 0                             | 1                     |
| <i>pot</i> x <i>Lhr</i> -2                  | 49                 | 0                             | 1                     |
| <i>pot</i> x <i>Lhr</i> -3                  | 26                 | 0                             | 0                     |
